# Supplementary material
Source: PubMed Central journal article supplement (PMC8168939)
Supplement: NIHMS1701242-supplement-2.pdf [file NIHMS1701242-supplement-2.pdf]

# Supplemental Material

11/30/2020

## Contents

|                                                                                                                                                      |           |
|------------------------------------------------------------------------------------------------------------------------------------------------------|-----------|
| Load Workspace . . . . .                                                                                                                             | 2         |
| <b>Introduction to the Supplemental File.</b>                                                                                                        | <b>3</b>  |
| <b>0. Intercept Only Model</b>                                                                                                                       | <b>4</b>  |
| <b>1. Cognitive Change as Function of Age</b>                                                                                                        | <b>7</b>  |
| 1.1. Age, with fixed effect only . . . . .                                                                                                           | 7         |
| 1.2. Age, with fixed and random effects . . . . .                                                                                                    | 8         |
| 1.3. Age, with fixed effect only, including covariates . . . . .                                                                                     | 9         |
| 1.4. Age, with random effects, including covariates. Table and meta analysis presented in main manuscript . . . . .                                  | 10        |
| <b>2. Cognitive Change as Function of Age and Time Since Dementia Diagnosis.</b>                                                                     | <b>14</b> |
| 2.1. Age and Time Since Dementia Diagnosis, fixed effects only . . . . .                                                                             | 14        |
| 2.2. Age and Time Since Dementia Diagnosis, with random effects . . . . .                                                                            | 15        |
| 2.3. Age and Time Since Dementia Diagnosis, with fixed effect only, including covariates . . . . .                                                   | 16        |
| 2.4. Age and Time Since Dementia Diagnosis, with random effects, including covariates. Table and meta analysis presented in main manuscript. . . . . | 17        |
| <b>3. Cognitive Change as Function of Age and Time Since Dementia Diagnosis, by personality traits.</b>                                              | <b>18</b> |
| 3.1. Neuroticism . . . . .                                                                                                                           | 18        |
| 3.1.1. Main Effect Only . . . . .                                                                                                                    | 18        |
| 3.1.2 Main Effect, with covariates . . . . .                                                                                                         | 19        |
| 3.1.3 Interaction with Age . . . . .                                                                                                                 | 20        |
| 3.1.4 Interaction with Age, with covariates . . . . .                                                                                                | 21        |
| 3.1.5 Interaction with Time Since Dementia . . . . .                                                                                                 | 23        |
| 3.1.6 Interaction with Time Since Dementia, with covariates . . . . .                                                                                | 24        |
| 3.1.7 Interaction with both Age and Time Since Dementia . . . . .                                                                                    | 26        |
| 3.1.8 Interaction with both Age and Time Since Dementia, with covariates. This table and meta-analysis are presented in the main manuscript. . . . . | 27        |
| 3.2. Extraversion . . . . .                                                                                                                          | 28        |
| 3.2.1. Main Effect Only . . . . .                                                                                                                    | 28        |
| 3.2.2 Main Effect, with covariates . . . . .                                                                                                         | 29        |
| 3.2.3 Interaction with Age . . . . .                                                                                                                 | 30        |
| 3.2.4 Interaction with Age, with covariates . . . . .                                                                                                | 31        |
| 3.2.5 Interaction with Time Since Dementia . . . . .                                                                                                 | 33        |
| 3.2.6 Interaction with Time Since Dementia, with covariates . . . . .                                                                                | 34        |
| 3.2.7 Interaction with both Age and Time Since Dementia . . . . .                                                                                    | 36        |
| 3.2.8 Interaction with both Age and Time Since Dementia, with covariates. This table and meta-analysis are presented in the main manuscript. . . . . | 37        |
| 3.3. Openness . . . . .                                                                                                                              | 38        |

|                                                                                                                                                      |    |
|------------------------------------------------------------------------------------------------------------------------------------------------------|----|
| 3.3.1. Main Effect Only . . . . .                                                                                                                    | 38 |
| 3.3.2 Main Effect, with covariates . . . . .                                                                                                         | 39 |
| 3.3.3 Interaction with Age . . . . .                                                                                                                 | 40 |
| 3.3.4 Interaction with Age, with covariates . . . . .                                                                                                | 41 |
| 3.3.5 Interaction with Time Since Dementia . . . . .                                                                                                 | 43 |
| 3.3.6 Interaction with Time Since Dementia, with covariates . . . . .                                                                                | 44 |
| 3.3.7 Interaction with both Age and Time Since Dementia . . . . .                                                                                    | 46 |
| 3.3.8 Interaction with both Age and Time Since Dementia, with covariates. This table and meta-analysis are presented in the main manuscript. . . . . | 47 |
| 3.4. Conscientiousness . . . . .                                                                                                                     | 48 |
| 3.4.1. Main Effect Only . . . . .                                                                                                                    | 48 |
| 3.4.2 Main Effect of Conscientioousness, with covariates . . . . .                                                                                   | 49 |
| 3.4.3 Interaction with Age . . . . .                                                                                                                 | 50 |
| 3.4.4 Interaction with Age, with covariates . . . . .                                                                                                | 51 |
| 3.4.5 Interaction with Time Since Dementia . . . . .                                                                                                 | 53 |
| 3.4.6 Interaction with Time Since Dementia, with covariates . . . . .                                                                                | 54 |
| 3.4.7 Interaction with both Age and Time Since Dementia . . . . .                                                                                    | 56 |
| 3.4.8 Interaction with both Age and Time Since Dementia, with covariates. This table and meta-analysis are presented in the main manuscript. . . . . | 57 |
| 3.1. Agreeableness . . . . .                                                                                                                         | 58 |
| 3.1.1. Main Effect Only . . . . .                                                                                                                    | 58 |
| 3.1.2 Main Effect, with covariates . . . . .                                                                                                         | 59 |
| 3.1.3 Interaction with Age . . . . .                                                                                                                 | 60 |
| 3.1.4 Interaction with Age, with covariates . . . . .                                                                                                | 61 |
| 3.1.5 Interaction with Time Since Dementia . . . . .                                                                                                 | 63 |
| 3.1.6 Interaction with Time Since Dementia, with covariates . . . . .                                                                                | 64 |
| 3.1.7 Interaction with both Age and Time Since Dementia . . . . .                                                                                    | 66 |
| 4.0 Likelihood ratio tests comparing models with fixed effect and random effects; power analysis . . . . .                                           | 67 |

## Contents

```
read_chunk("meta.R")
```

## Load Workspace

```
options(knitr.kable.NA = "")

num <- function(x, digits = 2, int = F) {
  num_internal = function(x = x) {
    if (is.character(x))
      x = as.numeric(x)
    if (int == TRUE)
      digits = 0
    if (int == FALSE)
      y <- prettyNum(round(x, digits))
    if (int == TRUE)
      y <- prettyNum(round(x), big.mark = ",")
    if (grepl("\\\\.", y))
      z <- strsplit(y, "\\.")
    if (grepl("\\\\.", y) & int == F) {
      y <- paste0(y, paste(rep(0, digits - nchar(z[[1]][2])), collapse = ""))
    }
  }
  num_internal(x)
}
```

```

    } else if (!grepl("\\.", y) & int == F & digits != 0) {
      y <- paste0(y, ".", paste(rep(0, digits), collapse = ""))
    }
    return(y)
  }
  if (length(x) == 1) {
    num_internal(x)
  } else sapply(x, num_internal)
}

# EAS = EAS; SATSA = MAP; ROS = ROS; MAP = SATSA
study.names = c("EAS", "SATSA", "ROS", "MAP")

for (i in study.names) {
  load(paste0("/Users/ekg870/Box Sync/Academics/Research/Admin Supplement Projects/JRP_Stage1/",
    i, "_output.Rdata"))
}

# for(i in study.names){
# load(paste0('P:\\Projects\\Personality\\JRP_1\\Data\\all_data\\',
# i, '_output.Rdata')) }

# SATSA_output = `SATSA_output-2level` rm(`SATSA_output-2level`)

```

## Introduction to the Supplemental File.

The following document contains model summaries for all results that are not presented in the main manuscript. This includes: models that evaluated the two time metrics separately (age and time since dementia are presented together in the main manuscript), and models that did not adjust for covariates. Code to recreate this document can be found on OSF (<https://osf.io/32wgf/>).

## 0. Intercept Only Model

Table S1: Intercept Only Model

| coef           | EAS       | MAP      | ROS      | SATSA    |
|----------------|-----------|----------|----------|----------|
| Intercept      | -0.07     | -0.14    | -0.14    | -0.12    |
| (se)           | 0.03      | 0.02     | 0.03     | 0.03     |
|                | p = 0.021 | p < .001 | p < .001 | p < .001 |
| $\tau_{00}$    | 0.77      | 0.94     | 0.89     | 0.77     |
| $\sigma^2$     | 0.31      | 0.24     | 0.29     | 0.29     |
| ICC            | 0.71      | 0.80     | 0.76     | 0.72     |
| $N_{totalobs}$ | 2,907     | 14,293   | 14,522   | 3,733    |
| Log Likelihood | -3244     | -13284   | -13911   | -4001    |
| NA             | 737       | 2,175    | 1,477    | 836      |

<sup>a</sup> ICC = Intra-Class Correlation;

Random-Effects Model (k = 4; tau<sup>2</sup> estimator: REML)

logLik deviance AIC BIC AICc 6.2073 -12.4147 -8.4147 -10.2175 3.5853

tau<sup>2</sup> (estimated amount of total heterogeneity): 0.0000 (SE = 0.0006) tau (square root of estimated tau<sup>2</sup> value): 0.0004 I<sup>2</sup> (total heterogeneity / total variability): 0.02% H<sup>2</sup> (total variability / sampling variability): 1.00

Test for Heterogeneity: Q(df = 3) = 3.4724, p-val = 0.3244

Model Results:

estimate se zval pval ci.lb ci.ub -0.1276 0.0134 -9.4937 <.0001 -0.1540 -0.1013 \*\*\*

---

Signif. codes: 0 ‘**0.001**’ ’ 0.01 ’ 0.05 ‘ 0.1 ’ 1

# 1. Cognitive Change as Function of Age

This section contains results from the models testing cognitive slopes with age as the time metric. There are three sets of models: 1) age, with fixed effect for slope only and no covariates; 2) age, with random effects, and no covariates; 3) age, with fixed effects, and with covariates. The fourth model, age with random effects and covariates, is presented in the main manuscript.

## 1.1. Age, with fixed effect only

Table S2: Cognitive Trajectories Across Age (fixed slopes only)

| coef                   | EAS      | MAP      | ROS      | SATSA    |
|------------------------|----------|----------|----------|----------|
| <b>Fixed Effects</b>   |          |          |          |          |
| Intercept              | 0.82     | 0.98     | 0.72     | 0.29     |
| (se)                   | 0.09     | 0.03     | 0.03     | 0.03     |
|                        | p < .001 | p < .001 | p < .001 | p < .001 |
| Age                    | -0.04    | -0.05    | -0.04    | -0.04    |
| (se)                   | 0        | 0        | 0        | 0        |
|                        | p < .001 | p < .001 | p < .001 | p < .001 |
| <b>Random Effects</b>  |          |          |          |          |
| Intercept Variance     | 0.76     | 0.86     | 0.75     | 0.62     |
| Residual( $\sigma^2$ ) | 0.30     | 0.21     | 0.25     | 0.21     |
| $N_{people}$           | 736      | 2,175    | 1,477    | 836      |
| $N_{totalobs}$         | 2,906    | 14,293   | 14,522   | 3,733    |
| Log Likelihood         | -3192    | -12332   | -12779   | -3420    |

```
##
## Random-Effects Model (k = 4; tau^2 estimator: REML)
##
##   logLik  deviance      AIC      BIC      AICc
## 12.3991 -24.7983 -20.7983 -22.6010 -8.7983
##
## tau^2 (estimated amount of total heterogeneity): 0.0000 (SE = 0.0000)
## tau (square root of estimated tau^2 value):      0.0038
## I^2 (total heterogeneity / total variability):   90.81%
## H^2 (total variability / sampling variability):  10.88
##
## Test for Heterogeneity:
## Q(df = 3) = 32.1116, p-val < .0001
##
## Model Results:
##
## estimate      se      zval      pval      ci.lb      ci.ub
## -0.0437  0.0021 -20.7562 <.0001 -0.0478 -0.0396 ***
##
## ---
## Signif. codes:  0 '***' 0.001 '**' 0.01 '*' 0.05 '.' 0.1 ' ' 1
```

## 1.2. Age, with fixed and random effects



Table S3: Cognitive Trajectories Across Age (with random slopes)

| coef                   | EAS      | MAP      | ROS      | SATSA    |
|------------------------|----------|----------|----------|----------|
| <b>Fixed Effects</b>   |          |          |          |          |
| Intercept              | 0.90     | 1.37     | 1.21     | 0.35     |
| (se)                   | 0.11     | 0.05     | 0.04     | 0.03     |
|                        | p < .001 | p < .001 | p < .001 | p < .001 |
| Age                    | -0.05    | -0.06    | -0.06    | -0.04    |
| (se)                   | 0.01     | 0        | 0        | 0        |
|                        | p < .001 | p < .001 | p < .001 | p < .001 |
| <b>Random Effects</b>  |          |          |          |          |
| Intercept Variance     | 2.67     | 3.40     | 1.75     | 0.75     |
| Slope Variance         | 0.01     | 0.01     | 0.01     | 0.00     |
| Int-Slope Cov          | -0.12    | -0.13    | -0.08    | -0.01    |
| Residual( $\sigma^2$ ) | 0.27     | 0.14     | 0.16     | 0.15     |
| $N_{people}$           | 736      | 2,175    | 1,477    | 836      |
| $N_{totalobs}$         | 2,906    | 14,293   | 14,522   | 3,733    |
| Log Likelihood         | -3156    | -11185   | -11110   | -3262    |

```
##
## Random-Effects Model (k = 4; tau^2 estimator: REML)
##
##   logLik deviance      AIC      BIC      AICc
##   9.3051 -18.6102 -14.6102 -16.4129  -2.6102
##
## tau^2 (estimated amount of total heterogeneity): 0.0001 (SE = 0.0001)
## tau (square root of estimated tau^2 value):      0.0106
## I^2 (total heterogeneity / total variability):   94.80%
## H^2 (total variability / sampling variability):  19.24
##
## Test for Heterogeneity:
## Q(df = 3) = 75.9274, p-val < .0001
##
## Model Results:
##
## estimate      se      zval      pval      ci.lb      ci.ub
## -0.0535  0.0055  -9.6939  <.0001  -0.0643  -0.0427  ***
##
## ---
## Signif. codes:  0 '***' 0.001 '**' 0.01 '*' 0.05 '.' 0.1 ' ' 1
```

### 1.3. Age, with fixed effect only, including covariates

Table S4: Cognitive Trajectories Across Age (fixed slopes only, and covariates)

| coef                   | EAS       | MAP      | ROS       | SATSA     |
|------------------------|-----------|----------|-----------|-----------|
| <b>Fixed Effects</b>   |           |          |           |           |
| Intercept              | 0.44      | 0.30     | 0.07      | 0.22      |
| (se)                   | 0.1       | 0.08     | 0.09      | 0.04      |
|                        | p < .001  | p < .001 | p = 0.223 | p < .001  |
| Age                    | -0.05     | -0.05    | -0.04     | -0.04     |
| (se)                   | 0         | 0        | 0         | 0         |
|                        | p < .001  | p < .001 | p < .001  | p < .001  |
| Sex                    | 0.00      | 0.26     | 0.30      | 0.09      |
| (se)                   | 0.06      | 0.04     | 0.05      | 0.05      |
|                        | p = 0.474 | p < .001 | p < .001  | p = 0.044 |
| Race                   | 0.67      | 0.53     | 0.47      |           |
| (se)                   | 0.07      | 0.08     | 0.08      |           |
|                        | p < .001  | p < .001 | p < .001  |           |
| Education              | 0.23      | 0.31     | 0.23      | 0.33      |
| (se)                   | 0.03      | 0.02     | 0.02      | 0.03      |
|                        | p < .001  | p < .001 | p < .001  | p < .001  |
| <b>Random Effects</b>  |           |          |           |           |
| Intercept Variance     | 0.58      | 0.73     | 0.67      | 0.51      |
| Residual( $\sigma^2$ ) | 0.30      | 0.21     | 0.24      | 0.21      |
| $N_{people}$           | 736       | 2,175    | 1,476     | 827       |
| $N_{totalobs}$         | 2,906     | 14,293   | 14,499    | 3,691     |
| Log Likelihood         | -3111     | -12175   | -12642    | -3303     |

<sup>a</sup> ICC = Intra-Class Correlation;

```
##
## Random-Effects Model (k = 4; tau^2 estimator: REML)
##
##   logLik deviance      AIC      BIC      AICc
## 12.2175 -24.4351 -20.4351 -22.2378  -8.4351
##
## tau^2 (estimated amount of total heterogeneity): 0.0000 (SE = 0.0000)
## tau (square root of estimated tau^2 value):      0.0040
## I^2 (total heterogeneity / total variability):    91.77%
## H^2 (total variability / sampling variability):   12.16
##
## Test for Heterogeneity:
## Q(df = 3) = 37.3125, p-val < .0001
##
## Model Results:
##
## estimate      se      zval      pval      ci.lb      ci.ub
## -0.0440  0.0022 -19.9737 <.0001 -0.0483 -0.0396 ***
##
## ---
## Signif. codes:  0 '***' 0.001 '**' 0.01 '*' 0.05 '.' 0.1 ' ' 1
```

1.4. Age, with random effects, including covariates. Table and meta analysis presented in main manuscript

Table S5: Cognitive Trajectories Across Age (with random slopes and covariates)

| coef                   | EAS       | MAP      | ROS      | SATSA     |
|------------------------|-----------|----------|----------|-----------|
| <b>Fixed Effects</b>   |           |          |          |           |
| Intercept              | 0.50      | 0.64     | 0.40     | 0.27      |
| (se)                   | 0.11      | 0.1      | 0.09     | 0.05      |
|                        | p < .001  | p < .001 | p < .001 | p < .001  |
| Age                    | -0.05     | -0.06    | -0.06    | -0.04     |
| (se)                   | 0.01      | 0        | 0        | 0         |
|                        | p < .001  | p < .001 | p < .001 | p < .001  |
| Sex                    | 0.03      | 0.30     | 0.38     | 0.11      |
| (se)                   | 0.06      | 0.05     | 0.05     | 0.06      |
|                        | p = 0.327 | p < .001 | p < .001 | p = 0.027 |
| <b>Random Effects</b>  |           |          |          |           |
| Race                   | 0.69      | 0.53     | 0.59     |           |
| (se)                   | 0.06      | 0.08     | 0.08     |           |
|                        | p < .001  | p < .001 | p < .001 |           |
| Education              | 0.25      | 0.32     | 0.21     | 0.34      |
| (se)                   | 0.03      | 0.02     | 0.02     | 0.03      |
|                        | p < .001  | p < .001 | p < .001 | p < .001  |
| Intercept Variance     | 1.70      | 2.87     | 1.46     | 0.64      |
| Slope Variance         | 0.01      | 0.01     | 0.00     | 0.00      |
| Int-Slope Cov          | -0.09     | -0.11    | -0.07    | -0.01     |
| Residual( $\sigma^2$ ) | 0.27      | 0.14     | 0.16     | 0.15      |
| $N_{people}$           | 736       | 2,175    | 1,476    | 827       |
| $N_{totalobs}$         | 2,906     | 14,293   | 14,499   | 3,691     |
| Log Likelihood         | -3061     | -11035   | -10996   | -3148     |

```
##
## Random-Effects Model (k = 4; tau^2 estimator: REML)
##
##   logLik deviance      AIC      BIC      AICc
##   9.3451 -18.6902 -14.6902 -16.4929  -2.6902
##
## tau^2 (estimated amount of total heterogeneity): 0.0001 (SE = 0.0001)
## tau (square root of estimated tau^2 value):      0.0105
## I^2 (total heterogeneity / total variability):   95.03%
## H^2 (total variability / sampling variability):  20.13
##
## Test for Heterogeneity:
## Q(df = 3) = 85.1080, p-val < .0001
##
## Model Results:
##
## estimate      se      zval      pval      ci.lb      ci.ub
## -0.0540  0.0055  -9.8852  <.0001  -0.0647  -0.0433  ***
##
## ---
## Signif. codes:  0 '***' 0.001 '**' 0.01 '*' 0.05 '.' 0.1 ' ' 1

##
## Mixed-Effects Model (k = 4; tau^2 estimator: REML)
##
##   logLik deviance      AIC      BIC      AICc
##   7.1072 -14.2145  -8.2145 -12.1350  15.7855
##
## tau^2 (estimated amount of residual heterogeneity): 0.0000 (SE = 0.0000)
## tau (square root of estimated tau^2 value):      0.0053
```

```

## I^2 (residual heterogeneity / unaccounted variability): 77.69%
## H^2 (unaccounted variability / sampling variability): 4.48
## R^2 (amount of heterogeneity accounted for): 74.37%
##
## Test for Residual Heterogeneity:
## QE(df = 2) = 5.8046, p-val = 0.0549
##
## Test of Moderators (coefficient 2):
## QM(df = 1) = 7.7219, p-val = 0.0055
##
## Model Results:
##
##          estimate      se      zval      pval      ci.lb      ci.ub
## intrcpt      -0.0411  0.0056  -7.3713  <.0001  -0.0520  -0.0302  ***
## countryU.S.  -0.0184  0.0066  -2.7788  0.0055  -0.0314  -0.0054  **
##
## ---
## Signif. codes:  0 '***' 0.001 '**' 0.01 '*' 0.05 '.' 0.1 ' ' 1
##
## Mixed-Effects Model (k = 4; tau^2 estimator: REML)
##
##      logLik deviance      AIC      BIC      AICc
##      7.1072 -14.2145  -8.2145 -12.1350  15.7855
##
## tau^2 (estimated amount of residual heterogeneity): 0.0000 (SE = 0.0000)
## tau (square root of estimated tau^2 value): 0.0053
## I^2 (residual heterogeneity / unaccounted variability): 77.69%
## H^2 (unaccounted variability / sampling variability): 4.48
## R^2 (amount of heterogeneity accounted for): 74.37%
##
## Test for Residual Heterogeneity:
## QE(df = 2) = 5.8046, p-val = 0.0549
##
## Test of Moderators (coefficient 2):
## QM(df = 1) = 7.7219, p-val = 0.0055
##
## Model Results:
##
##          estimate      se      zval      pval      ci.lb      ci.ub
## intrcpt      -0.0595  0.0036 -16.6188  <.0001  -0.0665  -0.0525  ***
## interval3     0.0184  0.0066   2.7788  0.0055   0.0054   0.0314  **
##
## ---
## Signif. codes:  0 '***' 0.001 '**' 0.01 '*' 0.05 '.' 0.1 ' ' 1
##
## Mixed-Effects Model (k = 4; tau^2 estimator: REML)
##
##      logLik deviance      AIC      BIC      AICc
##      5.0591 -10.1183  -2.1183 -10.1183  37.8817
##
## tau^2 (estimated amount of residual heterogeneity): 0 (SE = 0.0000)
## tau (square root of estimated tau^2 value): 0
## I^2 (residual heterogeneity / unaccounted variability): 0.00%

```

```

## H^2 (unaccounted variability / sampling variability): 1.00
## R^2 (amount of heterogeneity accounted for): 100.00%
##
## Test for Residual Heterogeneity:
## QE(df = 1) = 0.2368, p-val = 0.6265
##
## Test of Moderators (coefficients 2:3):
## QM(df = 2) = 84.8712, p-val < .0001
##
## Model Results:
##
##          estimate      se      zval      pval      ci.lb      ci.ub
## intrcpt          -0.0411  0.0017 -24.2413 <.0001  -0.0444  -0.0378 ***
## personalityIPIP   -0.0084  0.0055  -1.5211  0.1282  -0.0192   0.0024
## personalityNEO-FFI -0.0214  0.0023  -9.1962 <.0001  -0.0259  -0.0168 ***
##
## ---
## Signif. codes:  0 '***' 0.001 '**' 0.01 '*' 0.05 '.' 0.1 ' ' 1

```

## **2. Cognitive Change as Function of Age and Time Since Dementia Diagnosis.**

This section contains results from the models testing cognitive slopes with age as the time metric, as well as time since dementia diagnosis. There are three sets of models: 1) model with fixed effect for slope only and no covariates; 2) model with fixed and random effects, and no covariates; 3) model with fixed and random effects, as well as covariates. The fourth set of models, with random effects and covariates, is presented in the main manuscript.

### **2.1. Age and Time Since Dementia Diagnosis, fixed effects only**

Table S6: Cognitive Trajectories Across Age and Time Since Dementia Diagnosis (fixed slopes only)

| coef                   | EAS      | MAP      | ROS      | SATSA    |
|------------------------|----------|----------|----------|----------|
| <b>Fixed Effects</b>   |          |          |          |          |
| Intercept              | 0.72     | 0.86     | 0.64     | 0.29     |
| (se)                   | 0.09     | 0.03     | 0.03     | 0.03     |
|                        | p < .001 | p < .001 | p < .001 | p < .001 |
| Age                    | -0.04    | -0.04    | -0.04    | -0.04    |
| (se)                   | 0        | 0        | 0        | 0        |
|                        | p < .001 | p < .001 | p < .001 | p < .001 |
| Dementia Dx            | -1.27    | -0.14    | -0.15    | -0.12    |
| (se)                   | 0.1      | 0.01     | 0        | 0.03     |
|                        | p < .001 | p < .001 | p < .001 | p < .001 |
| <b>Random Effects</b>  |          |          |          |          |
| Intercept Variance     | 0.71     | 0.80     | 0.66     | 0.62     |
| Residual( $\sigma^2$ ) | 0.29     | 0.20     | 0.23     | 0.21     |
| $N_{people}$           | 736      | 2,175    | 1,477    | 836      |
| $N_{totalobs}$         | 2,906    | 14,293   | 14,522   | 3,733    |
| Log Likelihood         | -3105    | -12084   | -12318   | -3411    |

```
##
## Random-Effects Model (k = 4; tau^2 estimator: REML)
##
##   logLik deviance      AIC      BIC      AICc
## -2.5299  5.0598   9.0598   7.2570  21.0598
##
## tau^2 (estimated amount of total heterogeneity): 0.3093 (SE = 0.2545)
## tau (square root of estimated tau^2 value):      0.5562
## I^2 (total heterogeneity / total variability):   99.97%
## H^2 (total variability / sampling variability):  3525.98
##
## Test for Heterogeneity:
## Q(df = 3) = 140.9497, p-val < .0001
##
## Model Results:
##
## estimate      se      zval      pval      ci.lb      ci.ub
## -0.4136  0.2792  -1.4816  0.1384  -0.9608  0.1335
##
## ---
## Signif. codes:  0 '***' 0.001 '**' 0.01 '*' 0.05 '.' 0.1 ' ' 1
```

## 2.2. Age and Time Since Dementia Diagnosis, with random effects

Table S7: Cognitive Trajectories Across Age and Time Since Dementia Diagnosis (with random slopes)

| coef                   | EAS      | MAP      | ROS      | SATSA     |
|------------------------|----------|----------|----------|-----------|
| <b>Fixed Effects</b>   |          |          |          |           |
| Intercept              | 0.78     | 1.19     | 1.01     | 0.35      |
| (se)                   | 0.1      | 0.05     | 0.04     | 0.03      |
|                        | p < .001 | p < .001 | p < .001 | p < .001  |
| Age                    | -0.04    | -0.05    | -0.05    | -0.04     |
| (se)                   | 0.01     | 0        | 0        | 0         |
|                        | p < .001 | p < .001 | p < .001 | p < .001  |
| Dementia Dx            | -1.23    | -0.13    | -0.12    | -0.08     |
| (se)                   | 0.1      | 0.01     | 0.01     | 0.03      |
|                        | p < .001 | p < .001 | p < .001 | p = 0.002 |
| <b>Random Effects</b>  |          |          |          |           |
| Intercept Variance     | 1.94     | 3.41     | 1.67     | 0.75      |
| Slope Variance         | 0.00     | 0.01     | 0.00     | 0.00      |
| Int-Slope Cov          | -0.08    | -0.12    | -0.07    | -0.01     |
| Residual( $\sigma^2$ ) | 0.26     | 0.14     | 0.16     | 0.15      |
| $N_{people}$           | 736      | 2,175    | 1,477    | 836       |
| $N_{totalobs}$         | 2,906    | 14,293   | 14,522   | 3,733     |
| Log Likelihood         | -3086    | -11066   | -10931   | -3258     |

```
##
## Random-Effects Model (k = 4; tau^2 estimator: REML)
##
##   logLik deviance      AIC      BIC      AICc
## -2.4881  4.9762   8.9762   7.1734  20.9762
##
## tau^2 (estimated amount of total heterogeneity): 0.2997 (SE = 0.2469)
## tau (square root of estimated tau^2 value):      0.5475
## I^2 (total heterogeneity / total variability):   99.95%
## H^2 (total variability / sampling variability):  2096.48
##
## Test for Heterogeneity:
## Q(df = 3) = 122.6188, p-val < .0001
##
## Model Results:
##
## estimate      se      zval      pval      ci.lb      ci.ub
## -0.3840  0.2750  -1.3965  0.1626  -0.9229  0.1549
##
## ---
## Signif. codes:  0 '***' 0.001 '**' 0.01 '*' 0.05 '.' 0.1 ' ' 1
```

### 2.3. Age and Time Since Dementia Diagnosis, with fixed effect only, including covariates



Table S8: Cognitive Trajectories Across Age and Time Since Dementia Diagnosis (with covariates)

| coef                  | EAS       | MAP       | ROS       | SATSA     |
|-----------------------|-----------|-----------|-----------|-----------|
| <b>Fixed Effects</b>  |           |           |           |           |
| Intercept             | 0.37      | 0.22      | 0.02      | 0.22      |
| (se)                  | 0.1       | 0.08      | 0.08      | 0.04      |
|                       | p < .001  | p = 0.004 | p = 0.407 | p < .001  |
| Age                   | -0.04     | -0.04     | -0.04     | -0.04     |
| (se)                  | 0         | 0         | 0         | 0         |
|                       | p < .001  | p < .001  | p < .001  | p < .001  |
| Dementia Dx           | -1.28     | -0.14     | -0.15     | -0.12     |
| (se)                  | 0.09      | 0.01      | 0         | 0.03      |
|                       | p < .001  | p < .001  | p < .001  | p < .001  |
| Sex                   | -0.01     | 0.25      | 0.30      | 0.09      |
| (se)                  | 0.06      | 0.04      | 0.05      | 0.05      |
|                       | p = 0.451 | p < .001  | p < .001  | p = 0.043 |
| Race                  | 0.65      | 0.50      | 0.44      |           |
| (se)                  | 0.06      | 0.07      | 0.08      |           |
|                       | p < .001  | p < .001  | p < .001  |           |
| Education             | 0.23      | 0.31      | 0.22      | 0.33      |
| (se)                  | 0.03      | 0.02      | 0.02      | 0.03      |
|                       | p < .001  | p < .001  | p < .001  | p < .001  |
| <b>Random Effects</b> |           |           |           |           |
| Intercept Variance    | 0.54      | 0.68      | 0.59      | 0.51      |
| $N_{people}$          | 736       | 2,175     | 1,476     | 827       |
| $N_{totalobs}$        | 2,906     | 14,293    | 14,499    | 3,691     |
| Log Likelihood        | -3022     | -11917    | -12170    | -3294     |
| NA                    | 0.29      | 0.20      | 0.23      | 0.21      |

```
##
## Random-Effects Model (k = 4; tau^2 estimator: REML)
##
##   logLik deviance      AIC      BIC      AICc
## -2.5536  5.1073   9.1073   7.3045  21.1073
##
## tau^2 (estimated amount of total heterogeneity): 0.3145 (SE = 0.2587)
## tau (square root of estimated tau^2 value):      0.5608
## I^2 (total heterogeneity / total variability):    99.97%
## H^2 (total variability / sampling variability):   3611.40
##
## Test for Heterogeneity:
## Q(df = 3) = 144.4178, p-val < .0001
##
## Model Results:
##
## estimate      se      zval      pval      ci.lb      ci.ub
## -0.4166  0.2814  -1.4801  0.1388  -0.9682  0.1350
##
## ---
## Signif. codes:  0 '***' 0.001 '**' 0.01 '*' 0.05 '.' 0.1 ' ' 1
```

2.4. Age and Time Since Dementia Diagnosis, with random effects, including covariates. Table and meta analysis presented in main manuscript.

### **3. Cognitive Change as Function of Age and Time Since Dementia Diagnosis, by personality traits.**

This section contains results with personality added to the above models: 1) a model with only the main effect of personality, 2) a model with the trait x age interaction, 3) a model with the trait x time since dementia interaction, and 4) a model with both interactions. These models are presented both with (.cov) and without covariates. The final model, with both interactions and covariates, is presented in the main manuscript and thus is not in this document.

#### **3.1. Neuroticism**

##### **3.1.1. Main Effect Only**

Table S9: Cognitive Trajectories, with Neuroticism (no interactions)

| coef                   | EAS      | MAP      | ROS      | SATSA     |
|------------------------|----------|----------|----------|-----------|
| <b>Fixed Effects</b>   |          |          |          |           |
| Intercept              | 0.77     | 1.25     | 1.01     | 0.35      |
| (se)                   | 0.1      | 0.05     | 0.04     | 0.03      |
|                        | p < .001 | p < .001 | p < .001 | p < .001  |
| Age                    | -0.04    | -0.05    | -0.05    | -0.04     |
| (se)                   | 0.01     | 0        | 0        | 0         |
|                        | p < .001 | p < .001 | p < .001 | p < .001  |
| Dementia Dx            | -1.23    | -0.16    | -0.12    | -0.08     |
| (se)                   | 0.1      | 0.01     | 0.01     | 0.03      |
|                        | p < .001 | p < .001 | p < .001 | p = 0.002 |
| Neuroticism            | -0.14    | -0.21    | -0.17    | -0.13     |
| (se)                   | 0.03     | 0.02     | 0.02     | 0.03      |
|                        | p < .001 | p < .001 | p < .001 | p < .001  |
| <b>Random Effects</b>  |          |          |          |           |
| Intercept Variance     | 1.91     | 2.74     | 1.66     | 0.74      |
| Slope Variance         | 0.00     | 0.00     | 0.00     | 0.00      |
| Int-Slope Cov          | -0.08    | -0.10    | -0.07    | -0.01     |
| Residual( $\sigma^2$ ) | 0.26     | 0.13     | 0.16     | 0.15      |
| $N_{people}$           | 736      | 1,781    | 1,471    | 823       |
| $N_{totalobs}$         | 2,906    | 12,712   | 14,497   | 3,687     |
| Log Likelihood         | -3077    | -9137    | -10855   | -3197     |

```
##
## Random-Effects Model (k = 4; tau^2 estimator: REML)
##
##   logLik  deviance      AIC      BIC      AICc
##   5.6941  -11.3882   -7.3882   -9.1910   4.6118
##
## tau^2 (estimated amount of total heterogeneity): 0.0007 (SE = 0.0011)
## tau (square root of estimated tau^2 value):      0.0257
## I^2 (total heterogeneity / total variability):   50.48%
## H^2 (total variability / sampling variability):   2.02
##
## Test for Heterogeneity:
## Q(df = 3) = 5.9596, p-val = 0.1136
##
## Model Results:
##
## estimate      se      zval      pval      ci.lb      ci.ub
## -0.1683  0.0182  -9.2415  <.0001  -0.2040  -0.1326  ***
##
## ---
## Signif. codes:  0 '***' 0.001 '**' 0.01 '*' 0.05 '.' 0.1 ' ' 1
```

### 3.1.2 Main Effect, with covariates

Table S10: Cognitive Trajectories, with Neuroticism (no interactions), with covariates

| coef                   | EAS       | MAP      | ROS      | SATSA     |
|------------------------|-----------|----------|----------|-----------|
| <b>Fixed Effects</b>   |           |          |          |           |
| Intercept              | 0.37      | 0.63     | 0.28     | 0.25      |
| (se)                   | 0.1       | 0.1      | 0.09     | 0.05      |
|                        | p < .001  | p < .001 | p < .001 | p < .001  |
| Age                    | -0.04     | -0.05    | -0.05    | -0.04     |
| (se)                   | 0         | 0        | 0        | 0         |
|                        | p < .001  | p < .001 | p < .001 | p < .001  |
| Dementia Dx            | -1.22     | -0.16    | -0.12    | -0.08     |
| (se)                   | 0.1       | 0.01     | 0.01     | 0.03      |
|                        | p < .001  | p < .001 | p < .001 | p = 0.002 |
| Neuroticism            | -0.12     | -0.15    | -0.15    | -0.11     |
| (se)                   | 0.03      | 0.02     | 0.02     | 0.03      |
|                        | p < .001  | p < .001 | p < .001 | p < .001  |
| Sex                    | 0.05      | 0.27     | 0.36     | 0.14      |
| (se)                   | 0.06      | 0.04     | 0.05     | 0.06      |
|                        | p = 0.207 | p < .001 | p < .001 | p = 0.006 |
| Race                   | 0.70      | 0.43     | 0.53     |           |
| (se)                   | 0.06      | 0.08     | 0.08     |           |
|                        | p < .001  | p < .001 | p < .001 |           |
| Education              | 0.23      | 0.26     | 0.19     | 0.33      |
| (se)                   | 0.03      | 0.02     | 0.02     | 0.03      |
|                        | p < .001  | p < .001 | p < .001 | p < .001  |
| <b>Random Effects</b>  |           |          |          |           |
| Intercept Variance     | 1.19      | 2.39     | 1.41     | 0.62      |
| Slope Variance         | 0.00      | 0.00     | 0.00     | 0.00      |
| Int-Slope Cov          | -0.06     | -0.09    | -0.06    | -0.01     |
| Residual( $\sigma^2$ ) | 0.26      | 0.14     | 0.16     | 0.15      |
| $N_{people}$           | 736       | 1,781    | 1,470    | 816       |
| $N_{totalobs}$         | 2,906     | 12,712   | 14,474   | 3,653     |
| Log Likelihood         | -2982     | -9034    | -10753   | -3103     |

```
##
## Random-Effects Model (k = 4; tau^2 estimator: REML)
##
##   logLik  deviance      AIC      BIC      AICc
##   7.1348 -14.2696 -10.2696 -12.0723  1.7304
##
## tau^2 (estimated amount of total heterogeneity): 0 (SE = 0.0004)
## tau (square root of estimated tau^2 value):      0
## I^2 (total heterogeneity / total variability):    0.00%
## H^2 (total variability / sampling variability):   1.00
##
## Test for Heterogeneity:
## Q(df = 3) = 2.4880, p-val = 0.4775
##
## Model Results:
##
## estimate      se      zval      pval      ci.lb      ci.ub
## -0.1384  0.0117 -11.8294 <.0001 -0.1614 -0.1155 ***
##
## ---
## Signif. codes:  0 '***' 0.001 '**' 0.01 '*' 0.05 '.' 0.1 ' ' 1
```

### 3.1.3 Interaction with Age

Table S11: Cognitive Trajectories over Time, by Neuroticism

| coef                   | EAS       | MAP       | ROS       | SATSA     |
|------------------------|-----------|-----------|-----------|-----------|
| <b>Fixed Effects</b>   |           |           |           |           |
| Intercept              | 0.76      | 1.25      | 1.01      | 0.35      |
| (se)                   | 0.1       | 0.05      | 0.04      | 0.03      |
|                        | p < .001  | p < .001  | p < .001  | p < .001  |
| Age                    | -0.04     | -0.05     | -0.05     | -0.04     |
| (se)                   | 0.01      | 0         | 0         | 0         |
|                        | p < .001  | p < .001  | p < .001  | p < .001  |
| Dementia Dx            | -1.23     | -0.16     | -0.12     | -0.08     |
| (se)                   | 0.1       | 0.01      | 0.01      | 0.03      |
|                        | p < .001  | p < .001  | p < .001  | p = 0.002 |
| Neuroticism            | -0.21     | -0.12     | -0.10     | -0.15     |
| (se)                   | 0.1       | 0.05      | 0.04      | 0.04      |
|                        | p = 0.021 | p = 0.011 | p = 0.012 | p < .001  |
| Age x Neuroticism      | 0.00      | 0.00      | 0.00      | 0.00      |
| (se)                   | 0.01      | 0         | 0         | 0         |
|                        | p = 0.235 | p = 0.039 | p = 0.024 | p = 0.12  |
| <b>Random Effects</b>  |           |           |           |           |
| Intercept Variance     | 1.88      | 2.74      | 1.65      | 0.74      |
| Slope Variance         | 0.00      | 0.00      | 0.00      | 0.00      |
| Int-Slope Cov          | -0.08     | -0.10     | -0.07     | -0.01     |
| Residual( $\sigma^2$ ) | 0.26      | 0.13      | 0.16      | 0.15      |
| $N_{people}$           | 736       | 1,781     | 1,471     | 823       |
| $N_{totalobs}$         | 2,906     | 12,712    | 14,497    | 3,687     |
| Log Likelihood         | -3077     | -9135     | -10853    | -3196     |

```
##
## Random-Effects Model (k = 4; tau^2 estimator: REML)
##
##   logLik  deviance      AIC      BIC      AICc
## 12.2622 -24.5243 -20.5243 -22.3271 -8.5243
##
## tau^2 (estimated amount of total heterogeneity): 0.0000 (SE = 0.0000)
## tau (square root of estimated tau^2 value):      0.0030
## I^2 (total heterogeneity / total variability):   61.13%
## H^2 (total variability / sampling variability):  2.57
##
## Test for Heterogeneity:
## Q(df = 3) = 7.8987, p-val = 0.0482
##
## Model Results:
##
## estimate      se      zval      pval      ci.lb      ci.ub
## -0.0013  0.0020 -0.6288  0.5295 -0.0052  0.0027
##
## ---
## Signif. codes:  0 '***' 0.001 '**' 0.01 '*' 0.05 '.' 0.1 ' ' 1
```

### 3.1.4 Interaction with Age, with covariates

Table S12: Cognitive Trajectories over Time, by Neuroticism (with covariates)

| coef                   | EAS       | MAP       | ROS       | SATSA     |
|------------------------|-----------|-----------|-----------|-----------|
| <b>Fixed Effects</b>   |           |           |           |           |
| Intercept              | 0.37      | 0.63      | 0.29      | 0.25      |
| (se)                   | 0.1       | 0.1       | 0.09      | 0.05      |
|                        | p < .001  | p < .001  | p < .001  | p < .001  |
| Age                    | -0.04     | -0.05     | -0.05     | -0.04     |
| (se)                   | 0         | 0         | 0         | 0         |
|                        | p < .001  | p < .001  | p < .001  | p < .001  |
| Dementia Dx            | -1.22     | -0.16     | -0.12     | -0.08     |
| (se)                   | 0.1       | 0.01      | 0.01      | 0.03      |
|                        | p < .001  | p < .001  | p < .001  | p = 0.002 |
| Neuroticism            | -0.16     | -0.06     | -0.07     | -0.12     |
| (se)                   | 0.09      | 0.05      | 0.04      | 0.03      |
|                        | p = 0.041 | p = 0.104 | p = 0.042 | p < .001  |
| Sex                    | 0.05      | 0.27      | 0.36      | 0.14      |
| (se)                   | 0.06      | 0.04      | 0.05      | 0.06      |
|                        | p = 0.207 | p < .001  | p < .001  | p = 0.006 |
| Race                   | 0.70      | 0.43      | 0.53      |           |
| (se)                   | 0.06      | 0.08      | 0.08      |           |
|                        | p < .001  | p < .001  | p < .001  |           |
| Education              | 0.23      | 0.26      | 0.19      | 0.33      |
| (se)                   | 0.03      | 0.02      | 0.02      | 0.03      |
|                        | p < .001  | p < .001  | p < .001  | p < .001  |
| Age x Neuroticism      | 0.00      | 0.00      | 0.00      | 0.00      |
| (se)                   | 0         | 0         | 0         | 0         |
|                        | p = 0.327 | p = 0.026 | p = 0.015 | p = 0.15  |
| <b>Random Effects</b>  |           |           |           |           |
| Intercept Variance     | 1.18      | 2.39      | 1.40      | 0.62      |
| Slope Variance         | 0.00      | 0.00      | 0.00      | 0.00      |
| Int-Slope Cov          | -0.06     | -0.09     | -0.06     | -0.01     |
| Residual( $\sigma^2$ ) | 0.26      | 0.13      | 0.16      | 0.15      |
| $N_{people}$           | 736       | 1,781     | 1,470     | 816       |
| $N_{totalobs}$         | 2,906     | 12,712    | 14,474    | 3,653     |
| Log Likelihood         | -2982     | -9032     | -10750    | -3102     |

```
##
## Random-Effects Model (k = 4; tau^2 estimator: REML)
##
##   logLik deviance      AIC      BIC      AICc
## 12.4371 -24.8743 -20.8743 -22.6770 -8.8743
##
## tau^2 (estimated amount of total heterogeneity): 0.0000 (SE = 0.0000)
## tau (square root of estimated tau^2 value):      0.0030
## I^2 (total heterogeneity / total variability):   62.33%
## H^2 (total variability / sampling variability):  2.65
##
## Test for Heterogeneity:
## Q(df = 3) = 7.8573, p-val = 0.0491
##
## Model Results:
##
## estimate      se      zval      pval      ci.lb      ci.ub
## -0.0017  0.0020 -0.8420  0.3998 -0.0055  0.0022
##
## ---
## Signif. codes:  0 '***' 0.001 '**' 0.01 '*' 0.05 '.' 0.1 ' ' 1
```

### 3.1.5 Interaction with Time Since Dementia

Table S13: Cognitive Change after Dementia Diagnosis, by Neuroticism

| coef                      | EAS      | MAP       | ROS      | SATSA     |
|---------------------------|----------|-----------|----------|-----------|
| <b>Fixed Effects</b>      |          |           |          |           |
| Intercept                 | 0.76     | 1.25      | 1.01     | 0.35      |
| (se)                      | 0.1      | 0.05      | 0.04     | 0.03      |
|                           | p < .001 | p < .001  | p < .001 | p < .001  |
| Age                       | -0.04    | -0.05     | -0.05    | -0.04     |
| (se)                      | 0.01     | 0         | 0        | 0         |
|                           | p < .001 | p < .001  | p < .001 | p < .001  |
| Dementia Dx               | -1.34    | -0.16     | -0.13    | -0.07     |
| (se)                      | 0.11     | 0.01      | 0.01     | 0.04      |
|                           | p < .001 | p < .001  | p < .001 | p = 0.033 |
| Neuroticism               | -0.14    | -0.21     | -0.17    | -0.13     |
| (se)                      | 0.03     | 0.02      | 0.02     | 0.03      |
|                           | p < .001 | p < .001  | p < .001 | p < .001  |
| Dementia x<br>Neuroticism | 0.39     | -0.02     | 0.02     | -0.03     |
| (se)                      | 0.12     | 0.01      | 0.01     | 0.04      |
|                           | p < .001 | p = 0.066 | p < .001 | p = 0.228 |
| <b>Random Effects</b>     |          |           |          |           |
| Intercept Variance        | 1.74     | 2.74      | 1.69     | 0.74      |
| Slope Variance            | 0.00     | 0.00      | 0.00     | 0.00      |
| Int-Slope Cov             | -0.07    | -0.10     | -0.07    | -0.01     |
| Residual( $\sigma^2$ )    | 0.26     | 0.13      | 0.16     | 0.15      |
| $N_{people}$              | 736      | 1,781     | 1,471    | 823       |
| $N_{totalobs}$            | 2,906    | 12,712    | 14,497   | 3,687     |
| Log Likelihood            | -3072    | -9136     | -10849   | -3196     |

```
##
## Random-Effects Model (k = 4; tau^2 estimator: REML)
##
##   logLik deviance      AIC      BIC      AICc
##   0.8948  -1.7896   2.2104   0.4076  14.2104
##
## tau^2 (estimated amount of total heterogeneity): 0.0201 (SE = 0.0187)
## tau (square root of estimated tau^2 value):      0.1417
## I^2 (total heterogeneity / total variability):   99.06%
## H^2 (total variability / sampling variability):  106.12
##
## Test for Heterogeneity:
## Q(df = 3) = 20.8205, p-val = 0.0001
##
## Model Results:
##
## estimate      se      zval      pval      ci.lb      ci.ub
##   0.0589  0.0758  0.7764  0.4375  -0.0897  0.2074
##
## ---
## Signif. codes:  0 '***' 0.001 '**' 0.01 '*' 0.05 '.' 0.1 ' ' 1
```

### 3.1.6 Interaction with Time Since Dementia, with covariates



Table S14: Cognitive Change Since Dementia Diagnosis, by Neuroticism (with covariates)

| coef                      | EAS       | MAP       | ROS      | SATSA     |
|---------------------------|-----------|-----------|----------|-----------|
| <b>Fixed Effects</b>      |           |           |          |           |
| Intercept                 | 0.37      | 0.63      | 0.28     | 0.25      |
| (se)                      | 0.1       | 0.1       | 0.09     | 0.05      |
|                           | p < .001  | p < .001  | p < .001 | p < .001  |
| Age                       | -0.04     | -0.05     | -0.05    | -0.04     |
| (se)                      | 0         | 0         | 0        | 0         |
|                           | p < .001  | p < .001  | p < .001 | p < .001  |
| Dementia Dx               | -1.34     | -0.16     | -0.13    | -0.07     |
| (se)                      | 0.11      | 0.01      | 0.01     | 0.04      |
|                           | p < .001  | p < .001  | p < .001 | p = 0.033 |
| Neuroticism               | -0.12     | -0.15     | -0.15    | -0.11     |
| (se)                      | 0.03      | 0.02      | 0.02     | 0.03      |
|                           | p < .001  | p < .001  | p < .001 | p < .001  |
| Sex                       | 0.05      | 0.27      | 0.36     | 0.14      |
| (se)                      | 0.06      | 0.04      | 0.05     | 0.06      |
|                           | p = 0.208 | p < .001  | p < .001 | p = 0.006 |
| Race                      | 0.70      | 0.42      | 0.53     |           |
| (se)                      | 0.06      | 0.08      | 0.08     |           |
|                           | p < .001  | p < .001  | p < .001 |           |
| Education                 | 0.23      | 0.26      | 0.19     | 0.33      |
| (se)                      | 0.03      | 0.02      | 0.02     | 0.03      |
|                           | p < .001  | p < .001  | p < .001 | p < .001  |
| Dementia x<br>Neuroticism | 0.41      | -0.02     | 0.02     | -0.03     |
| (se)                      | 0.12      | 0.01      | 0.01     | 0.04      |
|                           | p < .001  | p = 0.053 | p < .001 | p = 0.231 |
| <b>Random Effects</b>     |           |           |          |           |
| Intercept Variance        | 1.06      | 2.39      | 1.43     | 0.62      |
| Slope Variance            | 0.00      | 0.00      | 0.00     | 0.00      |
| Int-Slope Cov             | -0.05     | -0.09     | -0.06    | -0.01     |
| Residual( $\sigma^2$ )    | 0.26      | 0.13      | 0.16     | 0.15      |
| $N_{people}$              | 736       | 1,781     | 1,470    | 816       |
| $N_{totalobs}$            | 2,906     | 12,712    | 14,474   | 3,653     |
| Log Likelihood            | -2976     | -9033     | -10747   | -3103     |

```
##
## Random-Effects Model (k = 4; tau^2 estimator: REML)
##
## logLik deviance AIC BIC AICc
## 0.7170 -1.4339 2.5661 0.7633 14.5661
##
## tau^2 (estimated amount of total heterogeneity): 0.0246 (SE = 0.0225)
## tau (square root of estimated tau^2 value): 0.1567
## I^2 (total heterogeneity / total variability): 99.24%
## H^2 (total variability / sampling variability): 131.22
##
## Test for Heterogeneity:
## Q(df = 3) = 21.9293, p-val < .0001
##
## Model Results:
##
## estimate se zval pval ci.lb ci.ub
## 0.0658 0.0830 0.7923 0.4282 -0.0970 0.2285
##
## ---
## Signif. codes: 0 '***' 0.001 '**' 0.01 '*' 0.05 '.' 0.1 ' ' 1
```

### 3.1.7 Interaction with both Age and Time Since Dementia

Table S15: Cognitive Trajectories Across Age and Time Since Dementia Diagnosis, by Neuroticism

| coef                   | EAS       | MAP       | ROS       | SATSA     |
|------------------------|-----------|-----------|-----------|-----------|
| <b>Fixed Effects</b>   |           |           |           |           |
| Intercept              | 0.76      | 1.25      | 1.01      | 0.35      |
| (se)                   | 0.1       | 0.05      | 0.04      | 0.03      |
|                        | p < .001  | p < .001  | p < .001  | p < .001  |
| Age                    | -0.04     | -0.05     | -0.05     | -0.04     |
| (se)                   | 0.01      | 0         | 0         | 0         |
|                        | p < .001  | p < .001  | p < .001  | p < .001  |
| Dementia Dx            | -1.34     | -0.16     | -0.13     | -0.07     |
| (se)                   | 0.11      | 0.01      | 0.01      | 0.04      |
|                        | p < .001  | p < .001  | p < .001  | p = 0.032 |
| Neuroticism            | -0.19     | -0.13     | -0.08     | -0.15     |
| (se)                   | 0.1       | 0.05      | 0.04      | 0.04      |
|                        | p = 0.03  | p = 0.007 | p = 0.046 | p < .001  |
| Age x Neuroticism      | 0.00      | 0.00      | -0.01     | 0.00      |
| (se)                   | 0.01      | 0         | 0         | 0         |
|                        | p = 0.302 | p = 0.057 | p = 0.005 | p = 0.115 |
| Dementia x Neuroticism | 0.38      | -0.01     | 0.02      | -0.03     |
| (se)                   | 0.12      | 0.01      | 0.01      | 0.04      |
|                        | p < .001  | p = 0.099 | p < .001  | p = 0.219 |
| <b>Random Effects</b>  |           |           |           |           |
| Intercept Variance     | 1.72      | 2.74      | 1.68      | 0.74      |
| Slope Variance         | 0.00      | 0.00      | 0.00      | 0.00      |
| Int-Slope Cov          | -0.07     | -0.10     | -0.07     | -0.01     |
| Residual( $\sigma^2$ ) | 0.26      | 0.13      | 0.16      | 0.15      |
| $N_{people}$           | 736       | 1,781     | 1,471     | 823       |
| $N_{totalobs}$         | 2,906     | 12,712    | 14,497    | 3,687     |
| Log Likelihood         | -3072     | -9134     | -10845    | -3196     |

```
##
## Random-Effects Model (k = 4; tau^2 estimator: REML)
##
##   logLik deviance      AIC      BIC      AICc
##   0.9411  -1.8822   2.1178   0.3151  14.1178
##
## tau^2 (estimated amount of total heterogeneity): 0.0190 (SE = 0.0178)
## tau (square root of estimated tau^2 value):      0.1377
## I^2 (total heterogeneity / total variability):   98.98%
## H^2 (total variability / sampling variability):   98.37
##
## Test for Heterogeneity:
## Q(df = 3) = 20.5868, p-val = 0.0001
##
## Model Results:
##
## estimate      se      zval      pval      ci.lb      ci.ub
##   0.0578   0.0739   0.7828   0.4338  -0.0869   0.2026
##
## ---
## Signif. codes:  0 '***' 0.001 '**' 0.01 '*' 0.05 '.' 0.1 ' ' 1
```

3.1.8 Interaction with both Age and Time Since Dementia, with covariates. This table and meta-analysis are presented in the main manuscript.

## Linear Trajectories of Cognitive Performance Over Time, adjusted for Neuroticism

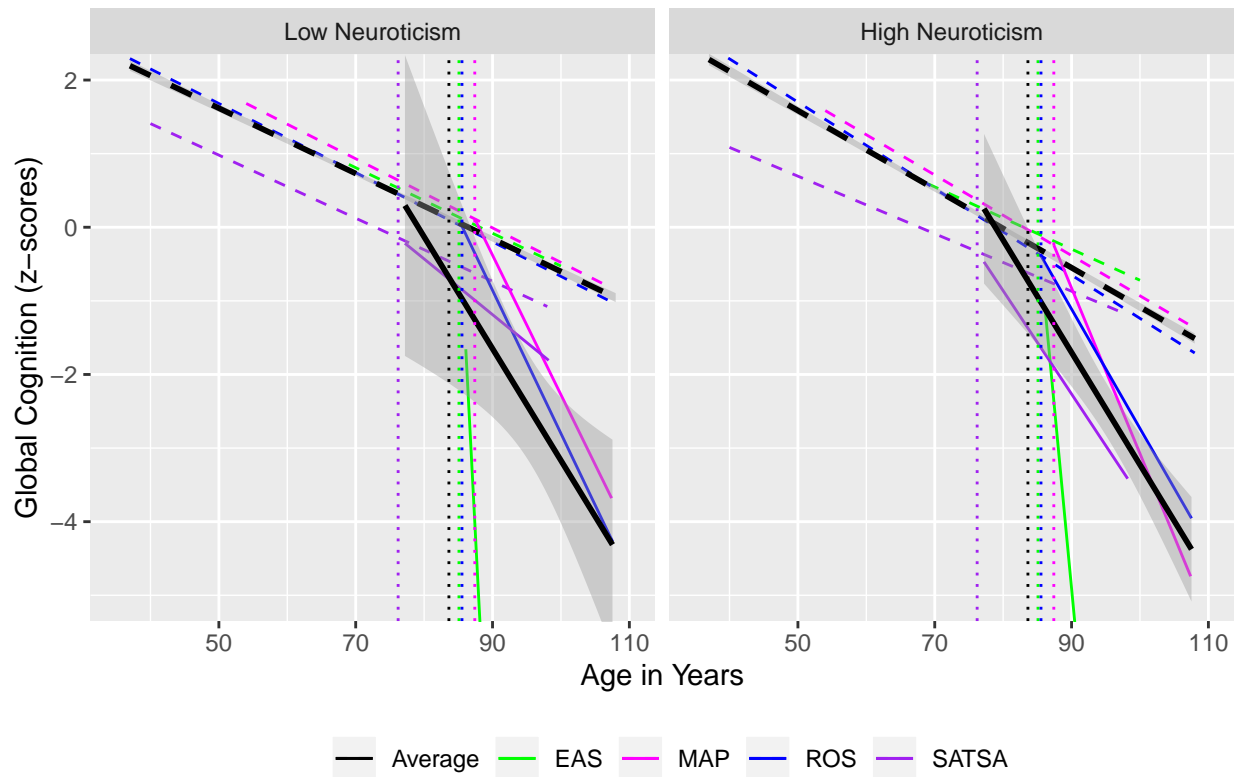

Figure S1: Overall cognitive trajectories across studies and the unique slope for individuals with dementia, among individuals high and low in neuroticism, and the average trajectories weighted by sample size

### 3.2. Extraversion

#### 3.2.1. Main Effect Only

Table S16: Cognitive Trajectories, with Extraversion (no interactions)

| coef                   | EAS       | MAP      | ROS       | SATSA     |
|------------------------|-----------|----------|-----------|-----------|
| <b>Fixed Effects</b>   |           |          |           |           |
| Intercept              | 0.78      | 1.18     | 1.01      | 0.35      |
| (se)                   | 0.1       | 0.05     | 0.04      | 0.03      |
|                        | p < .001  | p < .001 | p < .001  | p < .001  |
| Age                    | -0.04     | -0.05    | -0.05     | -0.04     |
| (se)                   | 0.01      | 0        | 0         | 0         |
|                        | p < .001  | p < .001 | p < .001  | p < .001  |
| Dementia Dx            | -1.23     | -0.14    | -0.12     | -0.08     |
| (se)                   | 0.1       | 0.01     | 0.01      | 0.03      |
|                        | p < .001  | p < .001 | p < .001  | p = 0.002 |
| Extraversion           | 0.04      | 0.08     | 0.07      | -0.01     |
| (se)                   | 0.03      | 0.02     | 0.02      | 0.03      |
|                        | p = 0.097 | p < .001 | p = 0.002 | p = 0.413 |
| <b>Random Effects</b>  |           |          |           |           |
| Intercept Variance     | 1.92      | 3.08     | 1.67      | 0.76      |
| Slope Variance         | 0.00      | 0.01     | 0.00      | 0.00      |
| Int-Slope Cov          | -0.08     | -0.11    | -0.07     | -0.01     |
| Residual( $\sigma^2$ ) | 0.26      | 0.14     | 0.16      | 0.15      |
| $N_{people}$           | 736       | 2,058    | 1,470     | 822       |
| $N_{totalobs}$         | 2,906     | 13,793   | 14,494    | 3,690     |
| Log Likelihood         | -3085     | -10403   | -10873    | -3202     |

```
##
## Random-Effects Model (k = 4; tau^2 estimator: REML)
##
##   logLik deviance      AIC      BIC      AICc
##   5.5083 -11.0165  -7.0165  -8.8193   4.9835
##
## tau^2 (estimated amount of total heterogeneity): 0.0008 (SE = 0.0012)
## tau (square root of estimated tau^2 value):      0.0279
## I^2 (total heterogeneity / total variability):   54.39%
## H^2 (total variability / sampling variability):  2.19
##
## Test for Heterogeneity:
## Q(df = 3) = 6.4179, p-val = 0.0930
##
## Model Results:
##
## estimate      se      zval      pval      ci.lb      ci.ub
##   0.0508  0.0190  2.6659  0.0077  0.0134  0.0881  **
##
## ---
## Signif. codes:  0 '***' 0.001 '**' 0.01 '*' 0.05 '.' 0.1 ' ' 1
```

### 3.2.2 Main Effect, with covariates

Table S17: Cognitive Trajectories, with Extraversion (no interactions), with covariates

| coef                   | EAS       | MAP       | ROS       | SATSA     |
|------------------------|-----------|-----------|-----------|-----------|
| <b>Fixed Effects</b>   |           |           |           |           |
| Intercept              | 0.41      | 0.54      | 0.31      | 0.27      |
| (se)                   | 0.1       | 0.09      | 0.09      | 0.05      |
|                        | p < .001  | p < .001  | p < .001  | p < .001  |
| Age                    | -0.04     | -0.05     | -0.05     | -0.04     |
| (se)                   | 0         | 0         | 0         | 0         |
|                        | p < .001  | p < .001  | p < .001  | p < .001  |
| Demdx                  | -1.23     | -0.14     | -0.12     | -0.08     |
| (se)                   | 0.1       | 0.01      | 0.01      | 0.03      |
|                        | p < .001  | p < .001  | p < .001  | p = 0.002 |
| Extraversion           | 0.03      | 0.06      | 0.03      | -0.03     |
| (se)                   | 0.03      | 0.02      | 0.02      | 0.03      |
|                        | p = 0.162 | p = 0.001 | p = 0.055 | p = 0.106 |
| Sex                    | 0.02      | 0.24      | 0.34      | 0.11      |
| (se)                   | 0.06      | 0.04      | 0.05      | 0.06      |
|                        | p = 0.367 | p < .001  | p < .001  | p = 0.028 |
| Race                   | 0.68      | 0.49      | 0.51      |           |
| (se)                   | 0.06      | 0.08      | 0.08      |           |
|                        | p < .001  | p < .001  | p < .001  |           |
| Education              | 0.25      | 0.31      | 0.21      | 0.34      |
| (se)                   | 0.03      | 0.02      | 0.02      | 0.03      |
|                        | p < .001  | p < .001  | p < .001  | p < .001  |
| <b>Random Effects</b>  |           |           |           |           |
| Intercept Variance     | 1.22      | 2.59      | 1.41      | 0.63      |
| Slope Variance         | 0.00      | 0.00      | 0.00      | 0.00      |
| Int-Slope Cov          | -0.06     | -0.10     | -0.06     | -0.01     |
| Residual( $\sigma^2$ ) | 0.26      | 0.14      | 0.16      | 0.15      |
| $N_{people}$           | 736       | 2,058     | 1,469     | 815       |
| $N_{totalobs}$         | 2,906     | 13,793    | 14,471    | 3,656     |
| Log Likelihood         | -2990     | -10247    | -10769    | -3106     |

```
##
## Random-Effects Model (k = 4; tau^2 estimator: REML)
##
##   logLik  deviance      AIC      BIC      AICc
##  5.5094 -11.0187  -7.0187  -8.8215   4.9813
##
## tau^2 (estimated amount of total heterogeneity): 0.0009 (SE = 0.0012)
## tau (square root of estimated tau^2 value):      0.0294
## I^2 (total heterogeneity / total variability):   60.99%
## H^2 (total variability / sampling variability):   2.56
##
## Test for Heterogeneity:
## Q(df = 3) = 7.5185, p-val = 0.0571
##
## Model Results:
##
## estimate      se      zval      pval      ci.lb      ci.ub
##  0.0244  0.0190  1.2881  0.1977  -0.0127  0.0616
##
## ---
## Signif. codes:  0 '***' 0.001 '**' 0.01 '*' 0.05 '.' 0.1 ' ' 1
```

### 3.2.3 Interaction with Age

Table S18: Cognitive Trajectories over Time, by Extraversion

| coef                   | EAS       | MAP       | ROS       | SATSA     |
|------------------------|-----------|-----------|-----------|-----------|
| <b>Fixed Effects</b>   |           |           |           |           |
| Intercept              | 0.78      | 1.18      | 1.01      | 0.35      |
| (se)                   | 0.1       | 0.05      | 0.04      | 0.03      |
|                        | p < .001  | p < .001  | p < .001  | p < .001  |
| Age                    | -0.04     | -0.05     | -0.05     | -0.04     |
| (se)                   | 0.01      | 0         | 0         | 0         |
|                        | p < .001  | p < .001  | p < .001  | p < .001  |
| Dementia Dx            | -1.23     | -0.14     | -0.12     | -0.08     |
| (se)                   | 0.1       | 0.01      | 0.01      | 0.03      |
|                        | p < .001  | p < .001  | p < .001  | p = 0.002 |
| Extraversion           | -0.07     | 0.04      | 0.04      | -0.02     |
| (se)                   | 0.11      | 0.05      | 0.04      | 0.03      |
|                        | p = 0.244 | p = 0.227 | p = 0.166 | p = 0.243 |
| Age x Extraversion     | 0.01      | 0.00      | 0.00      | 0.00      |
| (se)                   | 0.01      | 0         | 0         | 0         |
|                        | p = 0.121 | p = 0.183 | p = 0.26  | p = 0.144 |
| <b>Random Effects</b>  |           |           |           |           |
| Intercept Variance     | 1.95      | 3.08      | 1.67      | 0.76      |
| Slope Variance         | 0.00      | 0.01      | 0.00      | 0.00      |
| Int-Slope Cov          | -0.08     | -0.11     | -0.07     | -0.01     |
| Residual( $\sigma^2$ ) | 0.26      | 0.14      | 0.16      | 0.15      |
| $N_{people}$           | 736       | 2,058     | 1,470     | 822       |
| $N_{totalobs}$         | 2,906     | 13,793    | 14,494    | 3,690     |
| Log Likelihood         | -3084     | -10403    | -10873    | -3202     |

```
##
## Random-Effects Model (k = 4; tau^2 estimator: REML)
##
##   logLik deviance      AIC      BIC      AICc
## 14.6835 -29.3670 -25.3670 -27.1697 -13.3670
##
## tau^2 (estimated amount of total heterogeneity): 0 (SE = 0.0000)
## tau (square root of estimated tau^2 value):      0
## I^2 (total heterogeneity / total variability):   0.00%
## H^2 (total variability / sampling variability):   1.00
##
## Test for Heterogeneity:
## Q(df = 3) = 0.7132, p-val = 0.8701
##
## Model Results:
##
## estimate      se      zval      pval      ci.lb      ci.ub
## 0.0019 0.0011 1.7355 0.0826 -0.0002 0.0041 .
##
## ---
## Signif. codes:  0 '***' 0.001 '**' 0.01 '*' 0.05 '.' 0.1 ' ' 1
```

### 3.2.4 Interaction with Age, with covariates

Table S19: Cognitive Trajectories over Time, by Extraversion (with covariates)

| coef                   | EAS       | MAP       | ROS       | SATSA     |
|------------------------|-----------|-----------|-----------|-----------|
| <b>Fixed Effects</b>   |           |           |           |           |
| Intercept              | 0.41      | 0.55      | 0.31      | 0.27      |
| (se)                   | 0.1       | 0.09      | 0.09      | 0.05      |
|                        | p < .001  | p < .001  | p < .001  | p < .001  |
| Age                    | -0.04     | -0.05     | -0.05     | -0.04     |
| (se)                   | 0         | 0         | 0         | 0         |
|                        | p < .001  | p < .001  | p < .001  | p < .001  |
| Dementia Dx            | -1.22     | -0.14     | -0.12     | -0.08     |
| (se)                   | 0.1       | 0.01      | 0.01      | 0.03      |
|                        | p < .001  | p < .001  | p < .001  | p = 0.002 |
| Extraversion           | -0.08     | 0.01      | 0.01      | -0.05     |
| (se)                   | 0.09      | 0.05      | 0.04      | 0.03      |
|                        | p = 0.209 | p = 0.415 | p = 0.418 | p = 0.048 |
| Sex                    | 0.02      | 0.24      | 0.34      | 0.11      |
| (se)                   | 0.06      | 0.04      | 0.05      | 0.06      |
|                        | p = 0.373 | p < .001  | p < .001  | p = 0.028 |
| Race                   | 0.68      | 0.49      | 0.51      |           |
| (se)                   | 0.06      | 0.08      | 0.08      |           |
|                        | p < .001  | p < .001  | p < .001  |           |
| Education              | 0.25      | 0.31      | 0.21      | 0.34      |
| (se)                   | 0.03      | 0.02      | 0.02      | 0.03      |
|                        | p < .001  | p < .001  | p < .001  | p < .001  |
| Age x Extraversion     | 0.01      | 0.00      | 0.00      | 0.00      |
| (se)                   | 0         | 0         | 0         | 0         |
|                        | p = 0.12  | p = 0.151 | p = 0.232 | p = 0.122 |
| <b>Random Effects</b>  |           |           |           |           |
| Intercept Variance     | 1.25      | 2.59      | 1.41      | 0.63      |
| Slope Variance         | 0.00      | 0.00      | 0.00      | 0.00      |
| Int-Slope Cov          | -0.06     | -0.10     | -0.06     | -0.01     |
| Residual( $\sigma^2$ ) | 0.26      | 0.14      | 0.16      | 0.15      |
| $N_{people}$           | 736       | 2,058     | 1,469     | 815       |
| $N_{totalobs}$         | 2,906     | 13,793    | 14,471    | 3,656     |
| Log Likelihood         | -2989     | -10246    | -10769    | -3106     |

```
##
## Random-Effects Model (k = 4; tau^2 estimator: REML)
##
##   logLik deviance      AIC      BIC      AICc
## 14.8398 -29.6797 -25.6797 -27.4825 -13.6797
##
## tau^2 (estimated amount of total heterogeneity): 0 (SE = 0.0000)
## tau (square root of estimated tau^2 value):      0
## I^2 (total heterogeneity / total variability):   0.00%
## H^2 (total variability / sampling variability):   1.00
##
## Test for Heterogeneity:
## Q(df = 3) = 0.6350, p-val = 0.8884
##
## Model Results:
##
## estimate      se      zval      pval      ci.lb      ci.ub
## 0.0021 0.0011 1.9233 0.0544 -0.0000 0.0042 .
##
## ---
## Signif. codes:  0 '***' 0.001 '**' 0.01 '*' 0.05 '.' 0.1 ' ' 1
```



### 3.2.5 Interaction with Time Since Dementia

Table S20: Cognitive Change after Dementia Diagnosis, by Extraversion

| coef                    | EAS      | MAP      | ROS       | SATSA     |
|-------------------------|----------|----------|-----------|-----------|
| <b>Fixed Effects</b>    |          |          |           |           |
| Intercept               | 0.77     | 1.18     | 1.01      | 0.35      |
| (se)                    | 0.1      | 0.05     | 0.04      | 0.03      |
|                         | p < .001 | p < .001 | p < .001  | p < .001  |
| Age                     | -0.04    | -0.05    | -0.05     | -0.04     |
| (se)                    | 0.01     | 0        | 0         | 0         |
|                         | p < .001 | p < .001 | p < .001  | p < .001  |
| Dementia Dx             | -0.95    | -0.15    | -0.13     | -0.09     |
| (se)                    | 0.1      | 0.01     | 0.01      | 0.03      |
|                         | p < .001 | p < .001 | p < .001  | p < .001  |
| Extraversion            | 0.04     | 0.08     | 0.06      | -0.01     |
| (se)                    | 0.03     | 0.02     | 0.02      | 0.03      |
|                         | p = 0.11 | p < .001 | p = 0.002 | p = 0.406 |
| Dementia x Extraversion | 0.80     | -0.03    | -0.03     | 0.05      |
| (se)                    | 0.1      | 0.01     | 0.01      | 0.04      |
|                         | p < .001 | p < .001 | p < .001  | p = 0.143 |
| <b>Random Effects</b>   |          |          |           |           |
| Intercept Variance      | 1.81     | 3.07     | 1.68      | 0.76      |
| Slope Variance          | 0.00     | 0.01     | 0.00      | 0.00      |
| Int-Slope Cov           | -0.07    | -0.11    | -0.07     | -0.01     |
| Residual( $\sigma^2$ )  | 0.25     | 0.14     | 0.16      | 0.15      |
| $N_{people}$            | 736      | 2,058    | 1,470     | 822       |
| $N_{totalobs}$          | 2,906    | 13,793   | 14,494    | 3,690     |
| Log Likelihood          | -3052    | -10397   | -10862    | -3202     |

```
##
## Random-Effects Model (k = 4; tau^2 estimator: REML)
##
##   logLik deviance      AIC      BIC      AICc
## -1.4768  2.9537  6.9537  5.1509  18.9537
##
## tau^2 (estimated amount of total heterogeneity): 0.1495 (SE = 0.1244)
## tau (square root of estimated tau^2 value):      0.3867
## I^2 (total heterogeneity / total variability):   99.90%
## H^2 (total variability / sampling variability):   985.10
##
## Test for Heterogeneity:
## Q(df = 3) = 74.9662, p-val < .0001
##
## Model Results:
##
## estimate      se      zval      pval      ci.lb      ci.ub
##  0.1881  0.1951  0.9640  0.3350  -0.1943  0.5706
##
## ---
## Signif. codes:  0 '***' 0.001 '**' 0.01 '*' 0.05 '.' 0.1 ' ' 1
```

### 3.2.6 Interaction with Time Since Dementia, with covariates

Table S21: Cognitive Change after Dementia Diagnosis, by Extraversion (with covariates)

| coef                       | EAS       | MAP       | ROS       | SATSA     |
|----------------------------|-----------|-----------|-----------|-----------|
| <b>Fixed Effects</b>       |           |           |           |           |
| Intercept                  | 0.40      | 0.54      | 0.31      | 0.27      |
| (se)                       | 0.1       | 0.09      | 0.09      | 0.05      |
|                            | p < .001  | p < .001  | p < .001  | p < .001  |
| Age                        | -0.04     | -0.05     | -0.05     | -0.04     |
| (se)                       | 0         | 0         | 0         | 0         |
|                            | p < .001  | p < .001  | p < .001  | p < .001  |
| Dementia Dx                | -0.94     | -0.15     | -0.12     | -0.09     |
| (se)                       | 0.1       | 0.01      | 0.01      | 0.03      |
|                            | p < .001  | p < .001  | p < .001  | p < .001  |
| Extraversion               | 0.03      | 0.06      | 0.03      | -0.03     |
| (se)                       | 0.03      | 0.02      | 0.02      | 0.03      |
|                            | p = 0.177 | p = 0.001 | p = 0.067 | p = 0.102 |
| Sex                        | 0.03      | 0.24      | 0.34      | 0.11      |
| (se)                       | 0.06      | 0.04      | 0.05      | 0.06      |
|                            | p = 0.336 | p < .001  | p < .001  | p = 0.028 |
| Race                       | 0.67      | 0.49      | 0.51      |           |
| (se)                       | 0.06      | 0.08      | 0.08      |           |
|                            | p < .001  | p < .001  | p < .001  |           |
| Education                  | 0.25      | 0.31      | 0.21      | 0.34      |
| (se)                       | 0.03      | 0.02      | 0.02      | 0.03      |
|                            | p < .001  | p < .001  | p < .001  | p < .001  |
| Dementia x<br>Extraversion | 0.78      | -0.03     | -0.03     | 0.05      |
| (se)                       | 0.1       | 0.01      | 0.01      | 0.04      |
|                            | p < .001  | p < .001  | p < .001  | p = 0.149 |
| <b>Random Effects</b>      |           |           |           |           |
| Intercept Variance         | 1.15      | 2.58      | 1.42      | 0.63      |
| Slope Variance             | 0.00      | 0.00      | 0.00      | 0.00      |
| Int-Slope Cov              | -0.05     | -0.10     | -0.06     | -0.01     |
| Residual( $\sigma^2$ )     | 0.26      | 0.14      | 0.16      | 0.15      |
| $N_{people}$               | 736       | 2,058     | 1,469     | 815       |
| $N_{totalobs}$             | 2,906     | 13,793    | 14,471    | 3,656     |
| Log Likelihood             | -2958     | -10240    | -10758    | -3106     |

```
##
## Random-Effects Model (k = 4; tau^2 estimator: REML)
##
##   logLik  deviance      AIC      BIC      AICc
## -1.4040   2.8079   6.8079   5.0051  18.8079
##
## tau^2 (estimated amount of total heterogeneity): 0.1422 (SE = 0.1183)
## tau (square root of estimated tau^2 value):      0.3771
## I^2 (total heterogeneity / total variability):   99.90%
## H^2 (total variability / sampling variability):  958.32
##
## Test for Heterogeneity:
## Q(df = 3) = 72.5103, p-val < .0001
##
## Model Results:
##
## estimate      se      zval      pval      ci.lb      ci.ub
##  0.1826  0.1904  0.9594  0.3374  -0.1905  0.5557
##
## ---
## Signif. codes:  0 '***' 0.001 '**' 0.01 '*' 0.05 '.' 0.1 ' ' 1
```

### 3.2.7 Interaction with both Age and Time Since Dementia

Table S22: Cognitive Trajectories Across Age and Time Since Dementia Diagnosis, by Extraversion

| coef                    | EAS       | MAP       | ROS       | SATSA     |
|-------------------------|-----------|-----------|-----------|-----------|
| <b>Fixed Effects</b>    |           |           |           |           |
| Intercept               | 0.77      | 1.18      | 1.01      | 0.35      |
| (se)                    | 0.1       | 0.05      | 0.04      | 0.03      |
|                         | p < .001  | p < .001  | p < .001  | p < .001  |
| Age                     | -0.04     | -0.05     | -0.05     | -0.04     |
| (se)                    | 0.01      | 0         | 0         | 0         |
|                         | p < .001  | p < .001  | p < .001  | p < .001  |
| Dementia Dx             | -0.95     | -0.15     | -0.13     | -0.09     |
| (se)                    | 0.1       | 0.01      | 0.01      | 0.03      |
|                         | p < .001  | p < .001  | p < .001  | p < .001  |
| Extraversion            | -0.01     | 0.01      | 0.00      | -0.02     |
| (se)                    | 0.1       | 0.05      | 0.04      | 0.03      |
|                         | p = 0.47  | p = 0.449 | p = 0.458 | p = 0.243 |
| Age x Extraversion      | 0.00      | 0.00      | 0.00      | 0.00      |
| (se)                    | 0.01      | 0         | 0         | 0         |
|                         | p = 0.308 | p = 0.06  | p = 0.058 | p = 0.151 |
| Dementia x Extraversion | 0.79      | -0.03     | -0.03     | 0.05      |
| (se)                    | 0.1       | 0.01      | 0.01      | 0.04      |
|                         | p < .001  | p < .001  | p < .001  | p = 0.15  |
| <b>Random Effects</b>   |           |           |           |           |
| Intercept Variance      | 1.82      | 3.07      | 1.68      | 0.76      |
| Slope Variance          | 0.00      | 0.01      | 0.00      | 0.00      |
| Int-Slope Cov           | -0.07     | -0.11     | -0.07     | -0.01     |
| Residual( $\sigma^2$ )  | 0.25      | 0.14      | 0.16      | 0.15      |
| $N_{people}$            | 736       | 2,058     | 1,470     | 822       |
| $N_{totalobs}$          | 2,906     | 13,793    | 14,494    | 3,690     |
| Log Likelihood          | -3052     | -10396    | -10861    | -3201     |

```
##
## Random-Effects Model (k = 4; tau^2 estimator: REML)
##
##   logLik deviance      AIC      BIC      AICc
## -1.4686  2.9371  6.9371  5.1343  18.9371
##
## tau^2 (estimated amount of total heterogeneity): 0.1486 (SE = 0.1236)
## tau (square root of estimated tau^2 value):      0.3855
## I^2 (total heterogeneity / total variability):   99.89%
## H^2 (total variability / sampling variability):  946.71
##
## Test for Heterogeneity:
## Q(df = 3) = 74.1426, p-val < .0001
##
## Model Results:
##
## estimate      se      zval      pval      ci.lb      ci.ub
##  0.1856  0.1946  0.9537  0.3402  -0.1958  0.5669
##
## ---
## Signif. codes:  0 '***' 0.001 '**' 0.01 '*' 0.05 '.' 0.1 ' ' 1
```

3.2.8 Interaction with both Age and Time Since Dementia, with covariates. This table and meta-analysis are presented in the main manuscript.

## Linear Trajectories of Cognitive Performance Over Time, adjusted for Extraversi

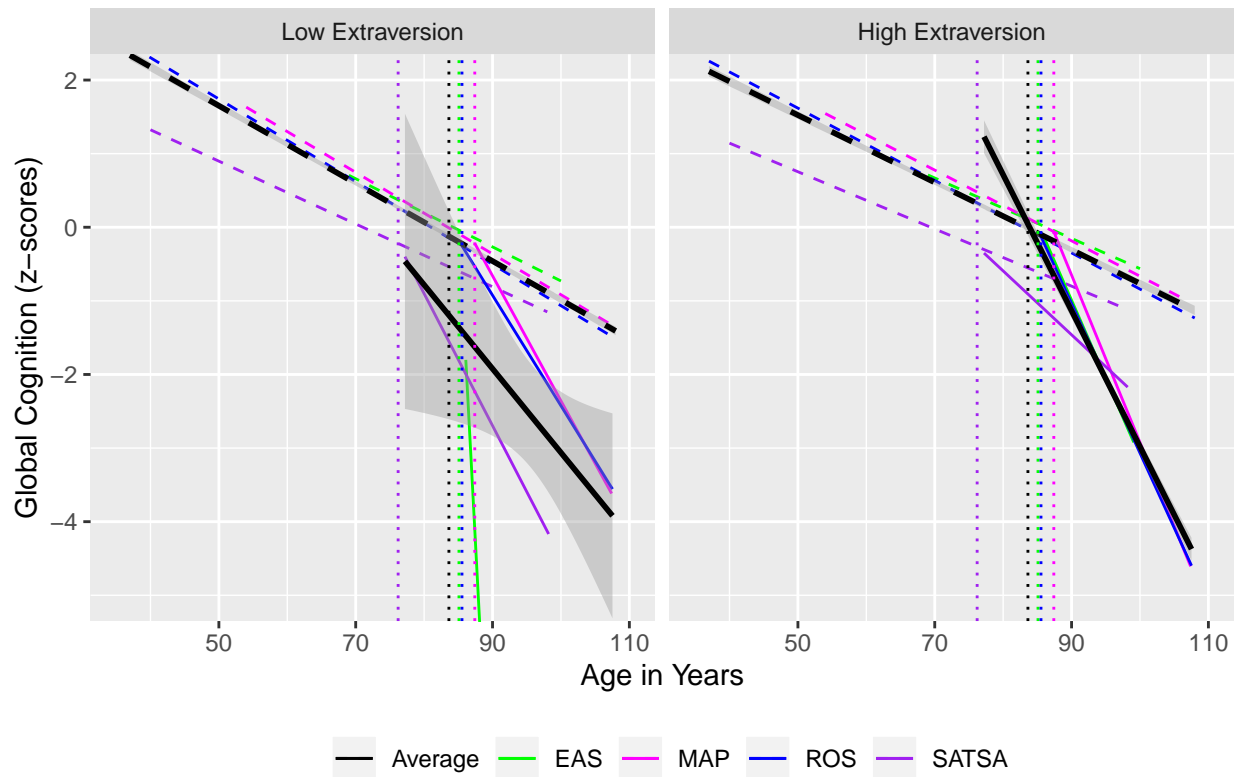

Figure S2: Overall cognitive trajectories across studies and the unique slope for individuals with dementia, among individuals high and low in Extraversion, and the average trajectories weighted by sample size

### 3.3. Openness

#### 3.3.1. Main Effect Only

Table S23: Cognitive Trajectories, with Openness (no interactions)

| coef                   | EAS      | ROS      | SATSA     |
|------------------------|----------|----------|-----------|
| <b>Fixed Effects</b>   |          |          |           |
| Intercept              | 0.77     | 1.00     | 0.42      |
| (se)                   | 0.1      | 0.04     | 0.03      |
|                        | p < .001 | p < .001 | p < .001  |
| Age                    | -0.04    | -0.05    | -0.04     |
| (se)                   | 0.01     | 0        | 0         |
|                        | p < .001 | p < .001 | p < .001  |
| Dementia Dx            | -1.24    | -0.13    | -0.08     |
| (se)                   | 0.1      | 0.01     | 0.03      |
|                        | p < .001 | p < .001 | p = 0.003 |
| Openness               | 0.24     | 0.20     | 0.28      |
| (se)                   | 0.03     | 0.02     | 0.03      |
|                        | p < .001 | p < .001 | p < .001  |
| <b>Random Effects</b>  |          |          |           |
| Intercept Variance     | 1.84     | 1.56     | 0.61      |
| Slope Variance         | 0.00     | 0.00     | 0.00      |
| Int-Slope Cov          | -0.08    | -0.06    | -0.01     |
| Residual( $\sigma^2$ ) | 0.26     | 0.16     | 0.15      |
| $N_{people}$           | 736      | 1,468    | 678       |
| $N_{totalobs}$         | 2,906    | 14,461   | 3,115     |
| Log Likelihood         | -3060    | -10805   | -2624     |

```
##
## Random-Effects Model (k = 3; tau^2 estimator: REML)
##
##   logLik  deviance      AIC      BIC      AICc
##   3.6285  -7.2570  -3.2570  -5.8707   8.7430
##
## tau^2 (estimated amount of total heterogeneity): 0.0008 (SE = 0.0016)
## tau (square root of estimated tau^2 value):      0.0289
## I^2 (total heterogeneity / total variability):   51.64%
## H^2 (total variability / sampling variability):   2.07
##
## Test for Heterogeneity:
## Q(df = 2) = 4.1446, p-val = 0.1259
##
## Model Results:
##
## estimate      se      zval      pval      ci.lb      ci.ub
##   0.2357  0.0232  10.1464  <.0001  0.1901  0.2812  ***
##
## ---
## Signif. codes:  0 '***' 0.001 '**' 0.01 '*' 0.05 '.' 0.1 ' ' 1
```

### 3.3.2 Main Effect, with covariates

Table S24: Cognitive Trajectories, with Openness (no interactions), with covariates

| coef                   | EAS       | ROS      | SATSA     |
|------------------------|-----------|----------|-----------|
| <b>Fixed Effects</b>   |           |          |           |
| Intercept              | 0.40      | 0.34     | 0.35      |
| (se)                   | 0.1       | 0.09     | 0.05      |
|                        | p < .001  | p < .001 | p < .001  |
| Age                    | -0.04     | -0.05    | -0.04     |
| (se)                   | 0         | 0        | 0         |
|                        | p < .001  | p < .001 | p < .001  |
| Dementia Dx            | -1.23     | -0.12    | -0.08     |
| (se)                   | 0.1       | 0.01     | 0.03      |
|                        | p < .001  | p < .001 | p = 0.003 |
| Openness               | 0.14      | 0.13     | 0.19      |
| (se)                   | 0.03      | 0.02     | 0.03      |
|                        | p < .001  | p < .001 | p < .001  |
| Sex                    | 0.03      | 0.31     | 0.08      |
| (se)                   | 0.06      | 0.05     | 0.06      |
|                        | p = 0.324 | p < .001 | p = 0.077 |
| Race                   | 0.69      | 0.50     |           |
| (se)                   | 0.06      | 0.08     |           |
|                        | p < .001  | p < .001 |           |
| Education              | 0.18      | 0.17     | 0.28      |
| (se)                   | 0.03      | 0.02     | 0.03      |
|                        | p < .001  | p < .001 | p < .001  |
| <b>Random Effects</b>  |           |          |           |
| Intercept Variance     | 1.18      | 1.37     | 0.53      |
| Slope Variance         | 0.00      | 0.00     | 0.00      |
| Int-Slope Cov          | -0.06     | -0.06    | -0.01     |
| Residual( $\sigma^2$ ) | 0.26      | 0.16     | 0.15      |
| $N_{people}$           | 736       | 1,467    | 672       |
| $N_{totalobs}$         | 2,906     | 14,438   | 3,089     |
| Log Likelihood         | -2980     | -10724   | -2561     |

```
##
## Random-Effects Model (k = 3; tau^2 estimator: REML)
##
##   logLik  deviance      AIC      BIC      AICc
##   3.8871  -7.7742  -3.7742  -6.3879   8.2258
##
## tau^2 (estimated amount of total heterogeneity): 0.0004 (SE = 0.0012)
## tau (square root of estimated tau^2 value):      0.0208
## I^2 (total heterogeneity / total variability):   35.69%
## H^2 (total variability / sampling variability):  1.55
##
## Test for Heterogeneity:
## Q(df = 2) = 3.0729, p-val = 0.2151
##
## Model Results:
##
## estimate      se      zval      pval      ci.lb      ci.ub
##   0.1525  0.0200  7.6449  <.0001  0.1134  0.1916  ***
##
## ---
## Signif. codes:  0 '***' 0.001 '**' 0.01 '*' 0.05 '.' 0.1 ' ' 1
```

### 3.3.3 Interaction with Age



Table S25: Cognitive Trajectories over Time, by Openness

| coef                        | EAS       | ROS       | SATSA     |
|-----------------------------|-----------|-----------|-----------|
| <b>Fixed Effects</b>        |           |           |           |
| Intercept                   | 0.75      | 1.00      | 0.42      |
| (se)                        | 0.1       | 0.04      | 0.03      |
|                             | p < .001  | p < .001  | p < .001  |
| Age                         | -0.04     | -0.05     | -0.04     |
| (se)                        | 0.01      | 0         | 0         |
|                             | p < .001  | p < .001  | p < .001  |
| Dementia Dx                 | -1.25     | -0.12     | -0.08     |
| (se)                        | 0.1       | 0.01      | 0.03      |
|                             | p < .001  | p < .001  | p = 0.003 |
| Openness                    | 0.41      | 0.18      | 0.30      |
| (se)                        | 0.1       | 0.04      | 0.04      |
|                             | p < .001  | p < .001  | p < .001  |
| Age x Openness              | -0.01     | 0.00      | 0.00      |
| (se)                        | 0.01      | 0         | 0         |
|                             | p = 0.037 | p = 0.267 | p = 0.082 |
| <b>Random Effects</b>       |           |           |           |
| Intercept Variance          | 1.74      | 1.56      | 0.61      |
| Slope Variance              | 0.00      | 0.00      | 0.00      |
| Int-Slope Cov               | -0.07     | -0.06     | -0.01     |
| Residual( $\sigma^2$ )      | 0.26      | 0.16      | 0.15      |
| <i>N<sub>people</sub></i>   | 736       | 1,468     | 678       |
| <i>N<sub>totalobs</sub></i> | 2,906     | 14,461    | 3,115     |
| Log Likelihood              | -3058     | -10805    | -2623     |

```
##
## Random-Effects Model (k = 3; tau^2 estimator: REML)
##
##   logLik  deviance      AIC      BIC      AICc
##   7.9056 -15.8113 -11.8113 -14.4250   0.1887
##
## tau^2 (estimated amount of total heterogeneity): 0.0000 (SE = 0.0000)
## tau (square root of estimated tau^2 value):      0.0031
## I^2 (total heterogeneity / total variability):   60.26%
## H^2 (total variability / sampling variability):  2.52
##
## Test for Heterogeneity:
## Q(df = 2) = 4.2878, p-val = 0.1172
##
## Model Results:
##
## estimate      se      zval      pval      ci.lb      ci.ub
## -0.0020  0.0024 -0.8420  0.3998 -0.0066  0.0026
##
## ---
## Signif. codes:  0 '***' 0.001 '**' 0.01 '*' 0.05 '.' 0.1 ' ' 1
```

### 3.3.4 Interaction with Age, with covariates

Table S26: Cognitive Trajectories over Time, by Openness (with covariates)

| coef                   | EAS       | ROS       | SATSA     |
|------------------------|-----------|-----------|-----------|
| <b>Fixed Effects</b>   |           |           |           |
| Intercept              | 0.39      | 0.34      | 0.34      |
| (se)                   | 0.1       | 0.09      | 0.05      |
|                        | p < .001  | p < .001  | p < .001  |
| Age                    | -0.04     | -0.05     | -0.04     |
| (se)                   | 0         | 0         | 0         |
|                        | p < .001  | p < .001  | p < .001  |
| Dementia Dx            | -1.24     | -0.12     | -0.08     |
| (se)                   | 0.1       | 0.01      | 0.03      |
|                        | p < .001  | p < .001  | p = 0.003 |
| Openness               | 0.30      | 0.11      | 0.21      |
| (se)                   | 0.09      | 0.04      | 0.03      |
|                        | p < .001  | p = 0.004 | p < .001  |
| Sex                    | 0.03      | 0.30      | 0.08      |
| (se)                   | 0.06      | 0.05      | 0.06      |
|                        | p = 0.315 | p < .001  | p = 0.075 |
| Race                   | 0.69      | 0.50      |           |
| (se)                   | 0.06      | 0.08      |           |
|                        | p < .001  | p < .001  |           |
| Education              | 0.18      | 0.17      | 0.28      |
| (se)                   | 0.03      | 0.02      | 0.03      |
|                        | p < .001  | p < .001  | p < .001  |
| Age x Openness         | -0.01     | 0.00      | 0.00      |
| (se)                   | 0         | 0         | 0         |
|                        | p = 0.034 | p = 0.255 | p = 0.11  |
| <b>Random Effects</b>  |           |           |           |
| Intercept Variance     | 1.10      | 1.36      | 0.53      |
| Slope Variance         | 0.00      | 0.00      | 0.00      |
| Int-Slope Cov          | -0.05     | -0.06     | -0.01     |
| Residual( $\sigma^2$ ) | 0.26      | 0.16      | 0.15      |
| $N_{people}$           | 736       | 1,467     | 672       |
| $N_{totalobs}$         | 2,906     | 14,438    | 3,089     |
| Log Likelihood         | -2979     | -10724    | -2560     |

```
##
## Random-Effects Model (k = 3; tau^2 estimator: REML)
##
##   logLik deviance      AIC      BIC      AICc
##   7.9477 -15.8954 -11.8954 -14.5091   0.1046
##
## tau^2 (estimated amount of total heterogeneity): 0.0000 (SE = 0.0000)
## tau (square root of estimated tau^2 value):      0.0031
## I^2 (total heterogeneity / total variability):   61.47%
## H^2 (total variability / sampling variability):  2.60
##
## Test for Heterogeneity:
## Q(df = 2) = 4.3286, p-val = 0.1148
##
## Model Results:
##
## estimate      se      zval      pval      ci.lb      ci.ub
## -0.0019  0.0023 -0.8014  0.4229 -0.0065  0.0027
##
## ---
## Signif. codes:  0 '***' 0.001 '**' 0.01 '*' 0.05 '.' 0.1 ' ' 1
```

### 3.3.5 Interaction with Time Since Dementia

Table S27: Cognitive Change after Dementia Diagnosis, by Openness

| coef                   | EAS       | ROS      | SATSA     |
|------------------------|-----------|----------|-----------|
| <b>Fixed Effects</b>   |           |          |           |
| Intercept              | 0.76      | 1.00     | 0.42      |
| (se)                   | 0.1       | 0.04     | 0.03      |
|                        | p < .001  | p < .001 | p < .001  |
| Age                    | -0.04     | -0.05    | -0.04     |
| (se)                   | 0.01      | 0        | 0         |
|                        | p < .001  | p < .001 | p < .001  |
| Dementia Dx            | -1.33     | -0.13    | -0.09     |
| (se)                   | 0.13      | 0.01     | 0.03      |
|                        | p < .001  | p < .001 | p = 0.002 |
| Openness               | 0.24      | 0.20     | 0.28      |
| (se)                   | 0.03      | 0.02     | 0.03      |
|                        | p < .001  | p < .001 | p < .001  |
| Dementia x<br>Openness | -0.11     | -0.02    | -0.05     |
| (se)                   | 0.1       | 0.01     | 0.02      |
|                        | p = 0.137 | p < .001 | p = 0.006 |
| <b>Random Effects</b>  |           |          |           |
| Intercept Variance     | 1.78      | 1.57     | 0.61      |
| Slope Variance         | 0.00      | 0.00     | 0.00      |
| Int-Slope Cov          | -0.08     | -0.06    | -0.01     |
| Residual( $\sigma^2$ ) | 0.26      | 0.16     | 0.15      |
| $N_{people}$           | 736       | 1,468    | 678       |
| $N_{totalobs}$         | 2,906     | 14,461   | 3,115     |
| Log Likelihood         | -3059     | -10800   | -2621     |

```
##
## Random-Effects Model (k = 3; tau^2 estimator: REML)
##
##   logLik deviance      AIC      BIC      AICc
##   3.8017  -7.6034  -3.6034  -6.2171   8.3966
##
## tau^2 (estimated amount of total heterogeneity): 0.0002 (SE = 0.0005)
## tau (square root of estimated tau^2 value):      0.0136
## I^2 (total heterogeneity / total variability):    32.09%
## H^2 (total variability / sampling variability):   1.47
##
## Test for Heterogeneity:
## Q(df = 2) = 2.5171, p-val = 0.2841
##
## Model Results:
##
## estimate      se      zval      pval      ci.lb      ci.ub
## -0.0302  0.0126  -2.3991  0.0164  -0.0549  -0.0055  *
##
## ---
## Signif. codes:  0 '***' 0.001 '**' 0.01 '*' 0.05 '.' 0.1 ' ' 1
```

### 3.3.6 Interaction with Time Since Dementia, with covariates

Table S28: Cognitive Change after Dementia Diagnosis, by Openness (with covariates)

| coef                   | EAS       | ROS      | SATSA     |
|------------------------|-----------|----------|-----------|
| <b>Fixed Effects</b>   |           |          |           |
| Intercept              | 0.40      | 0.34     | 0.35      |
| (se)                   | 0.1       | 0.09     | 0.05      |
|                        | p < .001  | p < .001 | p < .001  |
| Age                    | -0.04     | -0.05    | -0.04     |
| (se)                   | 0         | 0        | 0         |
|                        | p < .001  | p < .001 | p < .001  |
| Dementia Dx            | -1.34     | -0.13    | -0.09     |
| (se)                   | 0.13      | 0.01     | 0.03      |
|                        | p < .001  | p < .001 | p = 0.002 |
| Openness               | 0.14      | 0.13     | 0.19      |
| (se)                   | 0.03      | 0.02     | 0.03      |
|                        | p < .001  | p < .001 | p < .001  |
| Sex                    | 0.03      | 0.31     | 0.08      |
| (se)                   | 0.06      | 0.05     | 0.06      |
|                        | p = 0.329 | p < .001 | p = 0.077 |
| Race                   | 0.69      | 0.50     |           |
| (se)                   | 0.06      | 0.08     |           |
|                        | p < .001  | p < .001 |           |
| Education              | 0.18      | 0.17     | 0.28      |
| (se)                   | 0.03      | 0.02     | 0.03      |
|                        | p < .001  | p < .001 | p < .001  |
| Dementia x<br>Openness | -0.13     | -0.02    | -0.05     |
| (se)                   | 0.1       | 0.01     | 0.02      |
|                        | p = 0.097 | p < .001 | p = 0.006 |
| <b>Random Effects</b>  |           |          |           |
| Intercept Variance     | 1.13      | 1.38     | 0.53      |
| Slope Variance         | 0.00      | 0.00     | 0.00      |
| Int-Slope Cov          | -0.06     | -0.06    | -0.01     |
| Residual( $\sigma^2$ ) | 0.26      | 0.16     | 0.15      |
| $N_{people}$           | 736       | 1,467    | 672       |
| $N_{totalobs}$         | 2,906     | 14,438   | 3,089     |
| Log Likelihood         | -2979     | -10719   | -2557     |

```
##
## Random-Effects Model (k = 3; tau^2 estimator: REML)
##
##   logLik  deviance      AIC      BIC      AICc
##   3.6663  -7.3326  -3.3326  -5.9463   8.6674
##
## tau^2 (estimated amount of total heterogeneity): 0.0002 (SE = 0.0005)
## tau (square root of estimated tau^2 value):      0.0134
## I^2 (total heterogeneity / total variability):    31.40%
## H^2 (total variability / sampling variability):   1.46
##
## Test for Heterogeneity:
## Q(df = 2) = 2.7882, p-val = 0.2481
##
## Model Results:
##
## estimate      se      zval      pval      ci.lb      ci.ub
## -0.0306  0.0124  -2.4632  0.0138  -0.0550  -0.0063  *
##
## ---
## Signif. codes:  0 '***' 0.001 '**' 0.01 '*' 0.05 '.' 0.1 ' ' 1
```

### 3.3.7 Interaction with both Age and Time Since Dementia

Table S29: Cognitive Trajectories Across Age and Time Since Dementia Diagnosis, by Openness

| coef                        | EAS       | ROS       | SATSA     |
|-----------------------------|-----------|-----------|-----------|
| <b>Fixed Effects</b>        |           |           |           |
| Intercept                   | 0.75      | 1.00      | 0.42      |
| (se)                        | 0.1       | 0.04      | 0.03      |
|                             | p < .001  | p < .001  | p < .001  |
| Age                         | -0.04     | -0.05     | -0.04     |
| (se)                        | 0.01      | 0         | 0         |
|                             | p < .001  | p < .001  | p < .001  |
| Dementia Dx                 | -1.33     | -0.13     | -0.09     |
| (se)                        | 0.13      | 0.01      | 0.03      |
|                             | p < .001  | p < .001  | p = 0.002 |
| Openness                    | 0.40      | 0.15      | 0.30      |
| (se)                        | 0.1       | 0.04      | 0.04      |
|                             | p < .001  | p < .001  | p < .001  |
| Age x Openness              | -0.01     | 0.00      | 0.00      |
| (se)                        | 0.01      | 0         | 0         |
|                             | p = 0.043 | p = 0.094 | p = 0.111 |
| Dementia x<br>Openness      | -0.10     | -0.02     | -0.05     |
| (se)                        | 0.1       | 0.01      | 0.02      |
|                             | p = 0.163 | p < .001  | p = 0.008 |
| <b>Random Effects</b>       |           |           |           |
| Intercept Variance          | 1.69      | 1.57      | 0.61      |
| Slope Variance              | 0.00      | 0.00      | 0.00      |
| Int-Slope Cov               | -0.07     | -0.06     | -0.01     |
| Residual( $\sigma^2$ )      | 0.26      | 0.16      | 0.15      |
| <i>N<sub>people</sub></i>   | 736       | 1,468     | 678       |
| <i>N<sub>totalobs</sub></i> | 2,906     | 14,461    | 3,115     |
| Log Likelihood              | -3058     | -10799    | -2620     |

```
##
## Random-Effects Model (k = 3; tau^2 estimator: REML)
##
##   logLik  deviance      AIC      BIC      AICc
##   4.0178  -8.0357  -4.0357  -6.6494   7.9643
##
## tau^2 (estimated amount of total heterogeneity): 0.0001 (SE = 0.0004)
## tau (square root of estimated tau^2 value):      0.0094
## I^2 (total heterogeneity / total variability):   18.37%
## H^2 (total variability / sampling variability):  1.23
##
## Test for Heterogeneity:
## Q(df = 2) = 1.8716, p-val = 0.3923
##
## Model Results:
##
## estimate      se      zval      pval      ci.lb      ci.ub
## -0.0290  0.0101  -2.8608  0.0042  -0.0488  -0.0091  **
##
## ---
## Signif. codes:  0 '***' 0.001 '**' 0.01 '*' 0.05 '.' 0.1 ' ' 1
```

3.3.8 Interaction with both Age and Time Since Dementia, with covariates. This table and meta-analysis are presented in the main manuscript.

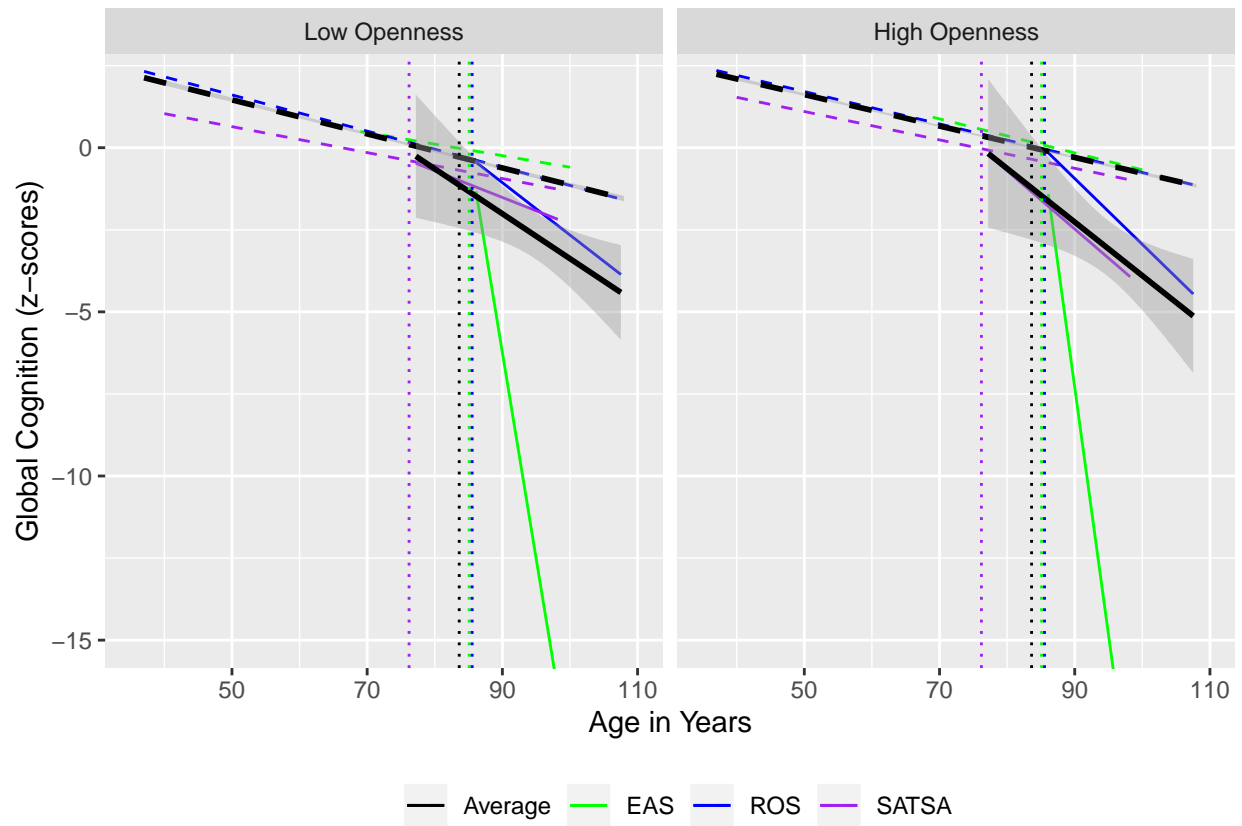

Figure S3: Overall cognitive trajectories across studies and the unique slope for individuals with dementia, among individuals high and low in Openness, and the average trajectories weighted by sample size

### 3.4. Conscientiousness

#### 3.4.1. Main Effect Only



Table S30: Cognitive Trajectories, with Conscientiousness (no interactions)

| coef                   | EAS       | MAP      | ROS      | SATSA     |
|------------------------|-----------|----------|----------|-----------|
| <b>Fixed Effects</b>   |           |          |          |           |
| Intercept              | 0.78      | 1.31     | 1.01     | 0.41      |
| (se)                   | 0.1       | 0.06     | 0.04     | 0.04      |
|                        | p < .001  | p < .001 | p < .001 | p < .001  |
| Age                    | -0.04     | -0.05    | -0.05    | -0.04     |
| (se)                   | 0.01      | 0        | 0        | 0         |
|                        | p < .001  | p < .001 | p < .001 | p < .001  |
| Dementia Dx            | -1.23     | -0.15    | -0.12    | -0.08     |
| (se)                   | 0.1       | 0.01     | 0.01     | 0.03      |
|                        | p < .001  | p < .001 | p < .001 | p = 0.004 |
| Conscientiousness      | 0.06      | 0.11     | 0.15     | -0.05     |
| (se)                   | 0.03      | 0.02     | 0.02     | 0.03      |
|                        | p = 0.039 | p < .001 | p < .001 | p = 0.058 |
| <b>Random Effects</b>  |           |          |          |           |
| Intercept Variance     | 1.92      | 2.29     | 1.68     | 0.71      |
| Slope Variance         | 0.00      | 0.00     | 0.00     | 0.00      |
| Int-Slope Cov          | -0.08     | -0.09    | -0.07    | -0.01     |
| Residual( $\sigma^2$ ) | 0.26      | 0.13     | 0.16     | 0.15      |
| $N_{people}$           | 736       | 1,233    | 1,471    | 700       |
| $N_{totalobs}$         | 2,906     | 10,216   | 14,497   | 3,225     |
| Log Likelihood         | -3084     | -6670    | -10863   | -2754     |

```
##
## Random-Effects Model (k = 4; tau^2 estimator: REML)
##
##   logLik  deviance      AIC      BIC      AICc
##   3.0601  -6.1202  -2.1202  -3.9230   9.8798
##
## tau^2 (estimated amount of total heterogeneity): 0.0067 (SE = 0.0061)
## tau (square root of estimated tau^2 value):      0.0819
## I^2 (total heterogeneity / total variability):    90.48%
## H^2 (total variability / sampling variability):   10.50
##
## Test for Heterogeneity:
## Q(df = 3) = 26.4476, p-val < .0001
##
## Model Results:
##
## estimate      se      zval      pval      ci.lb      ci.ub
##   0.0682  0.0433  1.5751  0.1152  -0.0167  0.1530
##
## ---
## Signif. codes:  0 '***' 0.001 '**' 0.01 '*' 0.05 '.' 0.1 ' ' 1
```

### 3.4.2 Main Effect of Conscientiousness, with covariates

Table S31: Cognitive Trajectories, with Conscientiousness (no interactions), with covariates

| coef                   | EAS       | MAP      | ROS      | SATSA     |
|------------------------|-----------|----------|----------|-----------|
| <b>Fixed Effects</b>   |           |          |          |           |
| Intercept              | 0.41      | 0.76     | 0.34     | 0.34      |
| (se)                   | 0.1       | 0.11     | 0.09     | 0.05      |
|                        | p < .001  | p < .001 | p < .001 | p < .001  |
| Age                    | -0.04     | -0.05    | -0.05    | -0.04     |
| (se)                   | 0         | 0        | 0        | 0         |
|                        | p < .001  | p < .001 | p < .001 | p < .001  |
| Dementia Dx            | -1.22     | -0.15    | -0.12    | -0.08     |
| (se)                   | 0.1       | 0.01     | 0.01     | 0.03      |
|                        | p < .001  | p < .001 | p < .001 | p = 0.004 |
| Conscientiousness      | 0.04      | 0.09     | 0.10     | -0.05     |
| (se)                   | 0.03      | 0.02     | 0.02     | 0.03      |
|                        | p = 0.077 | p < .001 | p < .001 | p = 0.059 |
| Sex                    | 0.02      | 0.15     | 0.31     | 0.08      |
| (se)                   | 0.06      | 0.05     | 0.05     | 0.06      |
|                        | p = 0.372 | p < .001 | p < .001 | p = 0.098 |
| Race                   | 0.68      | 0.41     | 0.50     |           |
| (se)                   | 0.06      | 0.09     | 0.08     |           |
|                        | p < .001  | p < .001 | p < .001 |           |
| Education              | 0.24      | 0.23     | 0.20     | 0.34      |
| (se)                   | 0.03      | 0.02     | 0.02     | 0.03      |
|                        | p < .001  | p < .001 | p < .001 | p < .001  |
| <b>Random Effects</b>  |           |          |          |           |
| Intercept Variance     | 1.23      | 2.08     | 1.42     | 0.58      |
| Slope Variance         | 0.00      | 0.00     | 0.00     | 0.00      |
| Int-Slope Cov          | -0.06     | -0.08    | -0.06    | -0.01     |
| Residual( $\sigma^2$ ) | 0.26      | 0.13     | 0.16     | 0.15      |
| $N_{people}$           | 736       | 1,233    | 1,470    | 694       |
| $N_{totalobs}$         | 2,906     | 10,216   | 14,474   | 3,199     |
| Log Likelihood         | -2989     | -6607    | -10767   | -2670     |

```
##
## Random-Effects Model (k = 4; tau^2 estimator: REML)
##
##   logLik  deviance      AIC      BIC      AICc
##   3.8639  -7.7278  -3.7278  -5.5306   8.2722
##
## tau^2 (estimated amount of total heterogeneity): 0.0037 (SE = 0.0035)
## tau (square root of estimated tau^2 value):      0.0605
## I^2 (total heterogeneity / total variability):    85.76%
## H^2 (total variability / sampling variability):   7.02
##
## Test for Heterogeneity:
## Q(df = 3) = 17.8672, p-val = 0.0005
##
## Model Results:
##
## estimate      se      zval      pval      ci.lb      ci.ub
##   0.0481  0.0329  1.4643  0.1431  -0.0163  0.1126
##
## ---
## Signif. codes:  0 '***' 0.001 '**' 0.01 '*' 0.05 '.' 0.1 ' ' 1
```

### 3.4.3 Interaction with Age

Table S32: Cognitive Trajectories over Time, by Conscientiousness

| coef                       | EAS       | MAP       | ROS       | SATSA     |
|----------------------------|-----------|-----------|-----------|-----------|
| <b>Fixed Effects</b>       |           |           |           |           |
| Intercept                  | 0.77      | 1.31      | 1.01      | 0.41      |
| (se)                       | 0.1       | 0.06      | 0.04      | 0.04      |
|                            | p < .001  | p < .001  | p < .001  | p < .001  |
| Age                        | -0.04     | -0.05     | -0.05     | -0.04     |
| (se)                       | 0.01      | 0         | 0         | 0         |
|                            | p < .001  | p < .001  | p < .001  | p < .001  |
| Dementia Dx                | -1.23     | -0.15     | -0.12     | -0.08     |
| (se)                       | 0.1       | 0.01      | 0.01      | 0.03      |
|                            | p < .001  | p < .001  | p < .001  | p = 0.004 |
| Conscientiousness          | 0.13      | -0.12     | 0.04      | -0.04     |
| (se)                       | 0.11      | 0.06      | 0.04      | 0.04      |
|                            | p = 0.106 | p = 0.017 | p = 0.208 | p = 0.13  |
| Age x<br>Conscientiousness | 0.00      | 0.01      | 0.01      | 0.00      |
| (se)                       | 0.01      | 0         | 0         | 0         |
|                            | p = 0.233 | p < .001  | p = 0.001 | p = 0.273 |
| <b>Random Effects</b>      |           |           |           |           |
| Intercept Variance         | 1.91      | 2.24      | 1.66      | 0.71      |
| Slope Variance             | 0.00      | 0.00      | 0.00      | 0.00      |
| Int-Slope Cov              | -0.08     | -0.09     | -0.07     | -0.01     |
| Residual( $\sigma^2$ )     | 0.26      | 0.13      | 0.16      | 0.15      |
| $N_{people}$               | 736       | 1,233     | 1,471     | 700       |
| $N_{totalobs}$             | 2,906     | 10,216    | 14,497    | 3,225     |
| Log Likelihood             | -3084     | -6661     | -10858    | -2754     |

```
##
## Random-Effects Model (k = 4; tau^2 estimator: REML)
##
##   logLik deviance      AIC      BIC      AICc
## 10.8488 -21.6976 -17.6976 -19.5003  -5.6976
##
## tau^2 (estimated amount of total heterogeneity): 0.0000 (SE = 0.0000)
## tau (square root of estimated tau^2 value):      0.0056
## I^2 (total heterogeneity / total variability):   83.84%
## H^2 (total variability / sampling variability):  6.19
##
## Test for Heterogeneity:
## Q(df = 3) = 18.4429, p-val = 0.0004
##
## Model Results:
##
## estimate      se      zval      pval      ci.lb      ci.ub
## 0.0037 0.0032 1.1506 0.2499 -0.0026 0.0099
##
## ---
## Signif. codes:  0 '***' 0.001 '**' 0.01 '*' 0.05 '.' 0.1 ' ' 1
```

### 3.4.4 Interaction with Age, with covariates

Table S33: Cognitive Trajectories over Time, by Conscientiousness (with covariates)

| coef                    | EAS       | MAP       | ROS       | SATSA     |
|-------------------------|-----------|-----------|-----------|-----------|
| <b>Fixed Effects</b>    |           |           |           |           |
| Intercept               | 0.41      | 0.76      | 0.35      | 0.34      |
| (se)                    | 0.1       | 0.11      | 0.09      | 0.05      |
|                         | p < .001  | p < .001  | p < .001  | p < .001  |
| Age                     | -0.04     | -0.04     | -0.05     | -0.04     |
| (se)                    | 0         | 0         | 0         | 0         |
|                         | p < .001  | p < .001  | p < .001  | p < .001  |
| Dementia Dx             | -1.23     | -0.15     | -0.12     | -0.08     |
| (se)                    | 0.1       | 0.01      | 0.01      | 0.03      |
|                         | p < .001  | p < .001  | p < .001  | p = 0.004 |
| Conscientiousness       | 0.09      | -0.13     | -0.02     | -0.04     |
| (se)                    | 0.09      | 0.05      | 0.04      | 0.04      |
|                         | p = 0.184 | p = 0.007 | p = 0.338 | p = 0.129 |
| Sex                     | 0.02      | 0.15      | 0.31      | 0.08      |
| (se)                    | 0.06      | 0.05      | 0.05      | 0.06      |
|                         | p = 0.372 | p < .001  | p < .001  | p = 0.098 |
| Race                    | 0.68      | 0.41      | 0.50      |           |
| (se)                    | 0.06      | 0.09      | 0.08      |           |
|                         | p < .001  | p < .001  | p < .001  |           |
| Education               | 0.24      | 0.23      | 0.20      | 0.34      |
| (se)                    | 0.03      | 0.02      | 0.02      | 0.03      |
|                         | p < .001  | p < .001  | p < .001  | p < .001  |
| Age x Conscientiousness | 0.00      | 0.01      | 0.01      | 0.00      |
| (se)                    | 0         | 0         | 0         | 0         |
|                         | p = 0.313 | p < .001  | p < .001  | p = 0.297 |
| <b>Random Effects</b>   |           |           |           |           |
| Intercept Variance      | 1.22      | 2.04      | 1.41      | 0.58      |
| Slope Variance          | 0.00      | 0.00      | 0.00      | 0.00      |
| Int-Slope Cov           | -0.06     | -0.08     | -0.06     | -0.01     |
| Residual( $\sigma^2$ )  | 0.26      | 0.13      | 0.16      | 0.15      |
| $N_{people}$            | 736       | 1,233     | 1,470     | 694       |
| $N_{totalobs}$          | 2,906     | 10,216    | 14,474    | 3,199     |
| Log Likelihood          | -2989     | -6597     | -10761    | -2670     |

```
##
## Random-Effects Model (k = 4; tau^2 estimator: REML)
##
##   logLik deviance      AIC      BIC      AICc
## 11.0209 -22.0418 -18.0418 -19.8446 -6.0418
##
## tau^2 (estimated amount of total heterogeneity): 0.0000 (SE = 0.0000)
## tau (square root of estimated tau^2 value):      0.0054
## I^2 (total heterogeneity / total variability):   83.16%
## H^2 (total variability / sampling variability):  5.94
##
## Test for Heterogeneity:
## Q(df = 3) = 18.3381, p-val = 0.0004
##
## Model Results:
##
## estimate      se      zval      pval      ci.lb      ci.ub
## 0.0040 0.0030 1.3161 0.1881 -0.0020 0.0099
##
## ---
## Signif. codes:  0 '***' 0.001 '**' 0.01 '*' 0.05 '.' 0.1 ' ' 1
```

### 3.4.5 Interaction with Time Since Dementia

Table S34: Cognitive Change after Dementia Diagnosis, by Conscientiousness

| coef                            | EAS       | MAP       | ROS      | SATSA     |
|---------------------------------|-----------|-----------|----------|-----------|
| <b>Fixed Effects</b>            |           |           |          |           |
| Intercept                       | 0.78      | 1.31      | 1.00     | 0.41      |
| (se)                            | 0.1       | 0.06      | 0.04     | 0.04      |
|                                 | p < .001  | p < .001  | p < .001 | p < .001  |
| Age                             | -0.04     | -0.05     | -0.05    | -0.04     |
| (se)                            | 0.01      | 0         | 0        | 0         |
|                                 | p < .001  | p < .001  | p < .001 | p < .001  |
| Dementia Dx                     | -1.27     | -0.15     | -0.13    | -0.09     |
| (se)                            | 0.12      | 0.01      | 0.01     | 0.03      |
|                                 | p < .001  | p < .001  | p < .001 | p = 0.002 |
| Conscientiousness               | 0.06      | 0.11      | 0.15     | -0.05     |
| (se)                            | 0.03      | 0.02      | 0.02     | 0.03      |
|                                 | p = 0.039 | p < .001  | p < .001 | p = 0.059 |
| Dementia x<br>Conscientiousness | -0.06     | 0.00      | -0.03    | -0.07     |
| (se)                            | 0.1       | 0.01      | 0.01     | 0.04      |
|                                 | p = 0.275 | p = 0.401 | p < .001 | p = 0.062 |
| <b>Random Effects</b>           |           |           |          |           |
| Intercept Variance              | 1.88      | 2.29      | 1.70     | 0.71      |
| Slope Variance                  | 0.00      | 0.00      | 0.00     | 0.00      |
| Int-Slope Cov                   | -0.08     | -0.09     | -0.07    | -0.01     |
| Residual( $\sigma^2$ )          | 0.26      | 0.13      | 0.16     | 0.15      |
| $N_{people}$                    | 736       | 1,233     | 1,471    | 700       |
| $N_{totalobs}$                  | 2,906     | 10,216    | 14,497   | 3,225     |
| Log Likelihood                  | -3084     | -6670     | -10852   | -2753     |

```
##
## Random-Effects Model (k = 4; tau^2 estimator: REML)
##
##   logLik deviance      AIC      BIC      AICc
##   5.7795 -11.5590  -7.5590  -9.3618   4.4410
##
## tau^2 (estimated amount of total heterogeneity): 0.0003 (SE = 0.0005)
## tau (square root of estimated tau^2 value):      0.0168
## I^2 (total heterogeneity / total variability):   57.68%
## H^2 (total variability / sampling variability):  2.36
##
## Test for Heterogeneity:
## Q(df = 3) = 6.3313, p-val = 0.0966
##
## Model Results:
##
## estimate      se      zval      pval      ci.lb      ci.ub      .
## -0.0220  0.0126  -1.7378  0.0822  -0.0468  0.0028
##
## ---
## Signif. codes:  0 '***' 0.001 '**' 0.01 '*' 0.05 '.' 0.1 ' ' 1
```

### 3.4.6 Interaction with Time Since Dementia, with covariates

Table S35: Cognitive Change after Dementia Diagnosis, by Conscientiousness (with covariates)

| coef                            | EAS       | MAP      | ROS      | SATSA     |
|---------------------------------|-----------|----------|----------|-----------|
| <b>Fixed Effects</b>            |           |          |          |           |
| Intercept                       | 0.41      | 0.76     | 0.34     | 0.34      |
| (se)                            | 0.1       | 0.11     | 0.09     | 0.05      |
|                                 | p < .001  | p < .001 | p < .001 | p < .001  |
| Age                             | -0.04     | -0.05    | -0.05    | -0.04     |
| (se)                            | 0         | 0        | 0        | 0         |
|                                 | p < .001  | p < .001 | p < .001 | p < .001  |
| Dementia Dx                     | -1.27     | -0.15    | -0.13    | -0.09     |
| (se)                            | 0.12      | 0.01     | 0.01     | 0.03      |
|                                 | p < .001  | p < .001 | p < .001 | p = 0.002 |
| Conscientiousness               | 0.04      | 0.09     | 0.10     | -0.05     |
| (se)                            | 0.03      | 0.02     | 0.02     | 0.03      |
|                                 | p = 0.077 | p < .001 | p < .001 | p = 0.059 |
| Sex                             | 0.02      | 0.15     | 0.31     | 0.08      |
| (se)                            | 0.06      | 0.05     | 0.05     | 0.06      |
|                                 | p = 0.374 | p < .001 | p < .001 | p = 0.096 |
| Race                            | 0.68      | 0.41     | 0.49     |           |
| (se)                            | 0.06      | 0.09     | 0.08     |           |
|                                 | p < .001  | p < .001 | p < .001 |           |
| Education                       | 0.24      | 0.23     | 0.20     | 0.34      |
| (se)                            | 0.03      | 0.02     | 0.02     | 0.03      |
|                                 | p < .001  | p < .001 | p < .001 | p < .001  |
| Dementia x<br>Conscientiousness | -0.06     | 0.00     | -0.03    | -0.07     |
| (se)                            | 0.1       | 0.01     | 0.01     | 0.04      |
|                                 | p = 0.255 | p = 0.47 | p < .001 | p = 0.062 |
| <b>Random Effects</b>           |           |          |          |           |
| Intercept Variance              | 1.20      | 2.08     | 1.44     | 0.58      |
| Slope Variance                  | 0.00      | 0.00     | 0.00     | 0.00      |
| Int-Slope Cov                   | -0.06     | -0.08    | -0.06    | -0.01     |
| Residual( $\sigma^2$ )          | 0.26      | 0.13     | 0.16     | 0.15      |
| <i>N<sub>people</sub></i>       | 736       | 1,233    | 1,470    | 694       |
| <i>N<sub>totalobs</sub></i>     | 2,906     | 10,216   | 14,474   | 3,199     |
| Log Likelihood                  | -2989     | -6607    | -10756   | -2669     |

```
##
## Random-Effects Model (k = 4; tau^2 estimator: REML)
##
##   logLik  deviance      AIC      BIC      AICc
##   5.6245 -11.2491  -7.2491  -9.0518   4.7509
##
## tau^2 (estimated amount of total heterogeneity): 0.0004 (SE = 0.0006)
## tau (square root of estimated tau^2 value):      0.0189
## I^2 (total heterogeneity / total variability):    63.73%
## H^2 (total variability / sampling variability):   2.76
##
## Test for Heterogeneity:
## Q(df = 3) = 7.5374, p-val = 0.0566
##
## Model Results:
##
## estimate      se      zval      pval      ci.lb      ci.ub
## -0.0208  0.0138  -1.5040  0.1326  -0.0479  0.0063
##
## ---
## Signif. codes:  0 '***' 0.001 '**' 0.01 '*' 0.05 '.' 0.1 ' ' 1
```

### 3.4.7 Interaction with both Age and Time Since Dementia



Table S36: Cognitive Trajectories Across Age and Time Since Dementia Diagnosis, by Conscientiousness

| coef                            | EAS       | MAP       | ROS       | SATSA     |
|---------------------------------|-----------|-----------|-----------|-----------|
| <b>Fixed Effects</b>            |           |           |           |           |
| Intercept                       | 0.77      | 1.31      | 1.01      | 0.41      |
| (se)                            | 0.1       | 0.06      | 0.04      | 0.04      |
|                                 | p < .001  | p < .001  | p < .001  | p < .001  |
| Age                             | -0.04     | -0.05     | -0.05     | -0.04     |
| (se)                            | 0.01      | 0         | 0         | 0         |
|                                 | p < .001  | p < .001  | p < .001  | p < .001  |
| Dementia Dx                     | -1.27     | -0.15     | -0.13     | -0.09     |
| (se)                            | 0.12      | 0.01      | 0.01      | 0.03      |
|                                 | p < .001  | p < .001  | p < .001  | p = 0.002 |
| Conscientiousness               | 0.13      | -0.12     | -0.01     | -0.04     |
| (se)                            | 0.11      | 0.06      | 0.04      | 0.04      |
|                                 | p = 0.114 | p = 0.014 | p = 0.453 | p = 0.126 |
| Age x<br>Conscientiousness      | 0.00      | 0.01      | 0.01      | 0.00      |
| (se)                            | 0.01      | 0         | 0         | 0         |
|                                 | p = 0.247 | p < .001  | p < .001  | p = 0.291 |
| Dementia x<br>Conscientiousness | -0.05     | -0.01     | -0.04     | -0.07     |
| (se)                            | 0.1       | 0.01      | 0.01      | 0.04      |
|                                 | p = 0.294 | p = 0.202 | p < .001  | p = 0.064 |
| <b>Random Effects</b>           |           |           |           |           |
| Intercept Variance              | 1.87      | 2.24      | 1.68      | 0.71      |
| Slope Variance                  | 0.00      | 0.00      | 0.00      | 0.00      |
| Int-Slope Cov                   | -0.08     | -0.09     | -0.07     | -0.01     |
| Residual( $\sigma^2$ )          | 0.26      | 0.13      | 0.16      | 0.15      |
| $N_{people}$                    | 736       | 1,233     | 1,471     | 700       |
| $N_{totalobs}$                  | 2,906     | 10,216    | 14,497    | 3,225     |
| Log Likelihood                  | -3084     | -6660     | -10844    | -2753     |

```
##
## Random-Effects Model (k = 4; tau^2 estimator: REML)
##
##   logLik deviance      AIC      BIC      AICc
##   3.1299  -6.2598  -2.2598  -4.0626   9.7402
##
## tau^2 (estimated amount of total heterogeneity): 0.0010 (SE = 0.0030)
## tau (square root of estimated tau^2 value):      0.0314
## I^2 (total heterogeneity / total variability):   26.23%
## H^2 (total variability / sampling variability):  1.36
##
## Test for Heterogeneity:
## Q(df = 3) = 5.3322, p-val = 0.1490
##
## Model Results:
##
## estimate      se      zval      pval      ci.lb      ci.ub
## -0.0365  0.0306  -1.1949  0.2321  -0.0964  0.0234
##
## ---
## Signif. codes:  0 '***' 0.001 '**' 0.01 '*' 0.05 '.' 0.1 ' ' 1
```

**3.4.8 Interaction with both Age and Time Since Dementia, with covariates. This table and meta-analysis are presented in the main manuscript.**

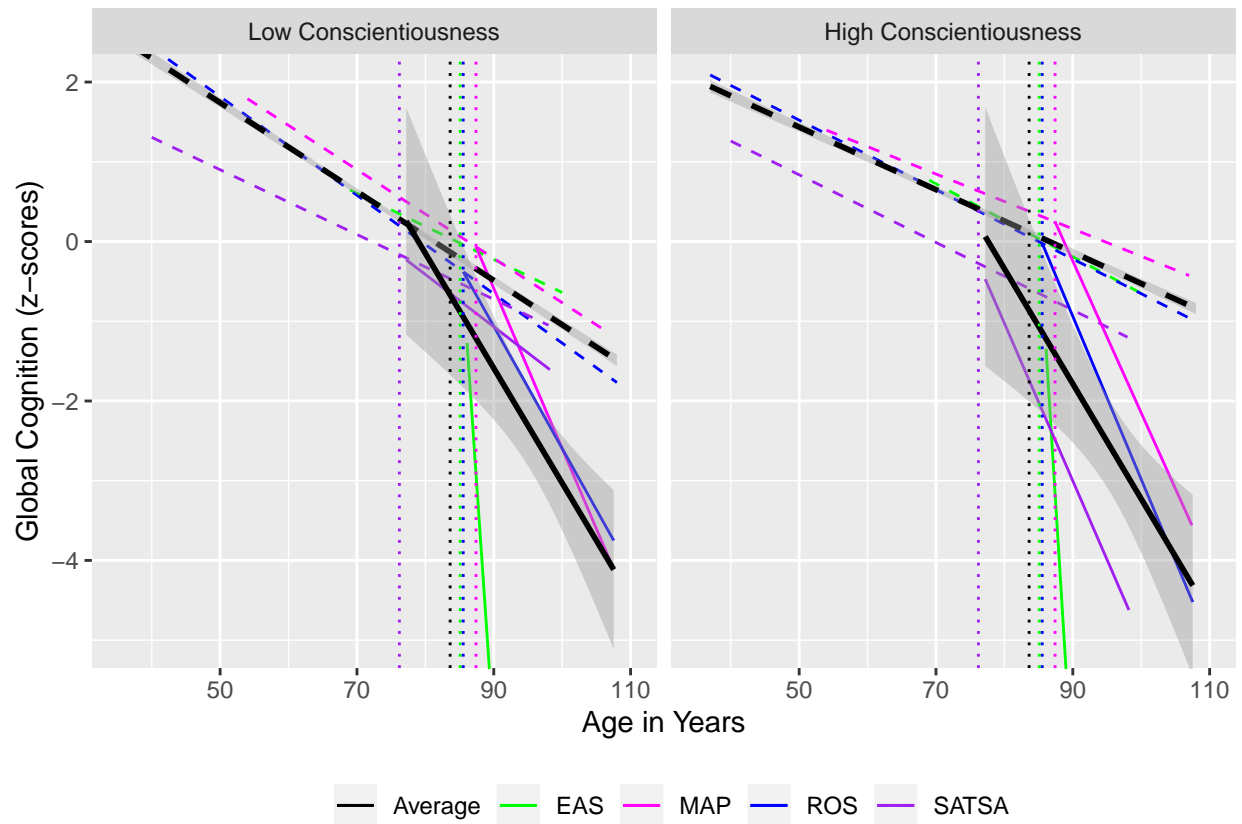

Figure S4: Overall cognitive trajectories across studies and the unique slope for individuals with dementia, among individuals high and low in Conscientiousness, and the average trajectories weighted by sample size

### 3.1. Agreeableness

#### 3.1.1. Main Effect Only

Table S37: Cognitive Trajectories, with agreeableness (no interactions)

| coef                   | EAS       | ROS      | SATSA     |
|------------------------|-----------|----------|-----------|
| <b>Fixed Effects</b>   |           |          |           |
| Intercept              | 0.80      | 1.00     | 0.41      |
| (se)                   | 0.1       | 0.04     | 0.04      |
|                        | p < .001  | p < .001 | p < .001  |
| Age                    | -0.04     | -0.05    | -0.04     |
| (se)                   | 0.01      | 0        | 0         |
|                        | p < .001  | p < .001 | p < .001  |
| Dementia Dx            | -1.23     | -0.12    | -0.08     |
| (se)                   | 0.1       | 0.01     | 0.03      |
|                        | p < .001  | p < .001 | p = 0.004 |
| Agreeableness          | 0.09      | 0.15     | -0.05     |
| (se)                   | 0.03      | 0.02     | 0.03      |
|                        | p = 0.002 | p < .001 | p = 0.063 |
| <b>Random Effects</b>  |           |          |           |
| Intercept Variance     | 1.98      | 1.61     | 0.72      |
| Slope Variance         | 0.00      | 0.00     | 0.00      |
| Int-Slope Cov          | -0.08     | -0.06    | -0.01     |
| Residual( $\sigma^2$ ) | 0.26      | 0.16     | 0.15      |
| $N_{people}$           | 736       | 1,466    | 707       |
| $N_{totalObs}$         | 2,906     | 14,441   | 3,232     |
| Log Likelihood         | -3082     | -10810   | -2760     |

```
##
## Random-Effects Model (k = 3; tau^2 estimator: REML)
##
##   logLik  deviance      AIC      BIC      AICc
##   1.7446  -3.4893   0.5107  -2.1030   12.5107
##
## tau^2 (estimated amount of total heterogeneity): 0.0094 (SE = 0.0102)
## tau (square root of estimated tau^2 value):      0.0967
## I^2 (total heterogeneity / total variability):   91.68%
## H^2 (total variability / sampling variability):  12.02
##
## Test for Heterogeneity:
## Q(df = 2) = 24.4364, p-val < .0001
##
## Model Results:
##
## estimate      se      zval      pval      ci.lb      ci.ub
##   0.0646  0.0584  1.1063  0.2686  -0.0499  0.1792
##
## ---
## Signif. codes:  0 '***' 0.001 '**' 0.01 '*' 0.05 '.' 0.1 ' ' 1
```

### 3.1.2 Main Effect, with covariates

Table S38: Cognitive Trajectories, with Agreeableness (no interactions), with covariates

| coef                   | EAS       | ROS      | SATSA     |
|------------------------|-----------|----------|-----------|
| <b>Fixed Effects</b>   |           |          |           |
| Intercept              | 0.44      | 0.35     | 0.32      |
| (se)                   | 0.11      | 0.09     | 0.05      |
|                        | p < .001  | p < .001 | p < .001  |
| Age                    | -0.04     | -0.05    | -0.04     |
| (se)                   | 0         | 0        | 0         |
|                        | p < .001  | p < .001 | p < .001  |
| Dementia Dx            | -1.22     | -0.12    | -0.08     |
| (se)                   | 0.1       | 0.01     | 0.03      |
|                        | p < .001  | p < .001 | p = 0.004 |
| Agreeableness          | 0.07      | 0.08     | -0.02     |
| (se)                   | 0.03      | 0.02     | 0.03      |
|                        | p = 0.006 | p < .001 | p = 0.281 |
| Sex                    | 0.00      | 0.32     | 0.10      |
| (se)                   | 0.06      | 0.05     | 0.06      |
|                        | p = 0.484 | p < .001 | p = 0.052 |
| Race                   | 0.67      | 0.47     |           |
| (se)                   | 0.06      | 0.08     |           |
|                        | p < .001  | p < .001 |           |
| Education              | 0.25      | 0.20     | 0.34      |
| (se)                   | 0.03      | 0.02     | 0.03      |
|                        | p < .001  | p < .001 | p < .001  |
| <b>Random Effects</b>  |           |          |           |
| Intercept Variance     | 1.28      | 1.39     | 0.58      |
| Slope Variance         | 0.00      | 0.00     | 0.00      |
| Int-Slope Cov          | -0.06     | -0.06    | -0.01     |
| Residual( $\sigma^2$ ) | 0.26      | 0.16     | 0.15      |
| $N_{people}$           | 736       | 1,465    | 701       |
| $N_{totalobs}$         | 2,906     | 14,418   | 3,206     |
| Log Likelihood         | -2987     | -10718   | -2677     |

```
##
## Random-Effects Model (k = 3; tau^2 estimator: REML)
##
##   logLik  deviance      AIC      BIC      AICc
##   2.9606  -5.9211  -1.9211  -4.5348  10.0789
##
## tau^2 (estimated amount of total heterogeneity): 0.0022 (SE = 0.0029)
## tau (square root of estimated tau^2 value):      0.0468
## I^2 (total heterogeneity / total variability):   74.90%
## H^2 (total variability / sampling variability):  3.98
##
## Test for Heterogeneity:
## Q(df = 2) = 7.5506, p-val = 0.0229
##
## Model Results:
##
## estimate      se      zval      pval      ci.lb      ci.ub
##   0.0486  0.0313  1.5521  0.1206  -0.0128  0.1099
##
## ---
## Signif. codes:  0 '***' 0.001 '**' 0.01 '*' 0.05 '.' 0.1 ' ' 1
```

### 3.1.3 Interaction with Age

Table S39: Cognitive Trajectories over Time, by Agreeableness

| coef                   | EAS       | ROS       | SATSA     |
|------------------------|-----------|-----------|-----------|
| <b>Fixed Effects</b>   |           |           |           |
| Intercept              | 0.80      | 1.00      | 0.41      |
| (se)                   | 0.11      | 0.04      | 0.04      |
|                        | p < .001  | p < .001  | p < .001  |
| Age                    | -0.04     | -0.05     | -0.04     |
| (se)                   | 0.01      | 0         | 0         |
|                        | p < .001  | p < .001  | p < .001  |
| Dementia Dx            | -1.23     | -0.12     | -0.08     |
| (se)                   | 0.1       | 0.01      | 0.03      |
|                        | p < .001  | p < .001  | p = 0.004 |
| Agreeableness          | 0.09      | 0.13      | -0.01     |
| (se)                   | 0.1       | 0.04      | 0.04      |
|                        | p = 0.206 | p = 0.001 | p = 0.445 |
| Age x Agreeableness    | 0.00      | 0.00      | 0.00      |
| (se)                   | 0.01      | 0         | 0         |
|                        | p = 0.468 | p = 0.338 | p = 0.006 |
| <b>Random Effects</b>  |           |           |           |
| Intercept Variance     | 1.98      | 1.61      | 0.72      |
| Slope Variance         | 0.00      | 0.00      | 0.00      |
| Int-Slope Cov          | -0.08     | -0.06     | -0.01     |
| Residual( $\sigma^2$ ) | 0.26      | 0.16      | 0.15      |
| $N_{people}$           | 736       | 1,466     | 707       |
| $N_{totalobs}$         | 2,906     | 14,441    | 3,232     |
| Log Likelihood         | -3082     | -10810    | -2757     |

```
##
## Random-Effects Model (k = 3; tau^2 estimator: REML)
##
##   logLik  deviance      AIC      BIC      AICc
##   8.3820 -16.7640 -12.7640 -15.3777  -0.7640
##
## tau^2 (estimated amount of total heterogeneity): 0.0000 (SE = 0.0000)
## tau (square root of estimated tau^2 value):      0.0025
## I^2 (total heterogeneity / total variability):   48.23%
## H^2 (total variability / sampling variability):  1.93
##
## Test for Heterogeneity:
## Q(df = 2) = 3.9858, p-val = 0.1363
##
## Model Results:
##
## estimate      se      zval      pval      ci.lb      ci.ub
## -0.0017  0.0021 -0.8090  0.4185  -0.0058  0.0024
##
## ---
## Signif. codes:  0 '***' 0.001 '**' 0.01 '*' 0.05 '.' 0.1 ' ' 1
```

### 3.1.4 Interaction with Age, with covariates

Table S40: Cognitive Trajectories over Time, by Agreeableness (with covariates)

| coef                   | EAS       | ROS       | SATSA     |
|------------------------|-----------|-----------|-----------|
| <b>Fixed Effects</b>   |           |           |           |
| Intercept              | 0.44      | 0.35      | 0.32      |
| (se)                   | 0.11      | 0.09      | 0.05      |
|                        | p < .001  | p < .001  | p < .001  |
| Age                    | -0.04     | -0.05     | -0.04     |
| (se)                   | 0         | 0         | 0         |
|                        | p < .001  | p < .001  | p < .001  |
| Dementia Dx            | -1.22     | -0.12     | -0.08     |
| (se)                   | 0.1       | 0.01      | 0.03      |
|                        | p < .001  | p < .001  | p = 0.004 |
| Agreeableness          | 0.06      | 0.06      | 0.02      |
| (se)                   | 0.09      | 0.04      | 0.04      |
|                        | p = 0.271 | p = 0.077 | p = 0.269 |
| Sex                    | 0.00      | 0.32      | 0.10      |
| (se)                   | 0.06      | 0.05      | 0.06      |
|                        | p = 0.484 | p < .001  | p = 0.052 |
| Race                   | 0.67      | 0.47      |           |
| (se)                   | 0.06      | 0.08      |           |
|                        | p < .001  | p < .001  |           |
| Education              | 0.25      | 0.20      | 0.34      |
| (se)                   | 0.03      | 0.02      | 0.03      |
|                        | p < .001  | p < .001  | p < .001  |
| Age x Agreeableness    | 0.00      | 0.00      | 0.00      |
| (se)                   | 0         | 0         | 0         |
|                        | p = 0.432 | p = 0.236 | p = 0.009 |
| <b>Random Effects</b>  |           |           |           |
| Intercept Variance     | 1.29      | 1.40      | 0.58      |
| Slope Variance         | 0.00      | 0.00      | 0.00      |
| Int-Slope Cov          | -0.06     | -0.06     | -0.01     |
| Residual( $\sigma^2$ ) | 0.26      | 0.16      | 0.15      |
| $N_{people}$           | 736       | 1,465     | 701       |
| $N_{totalobs}$         | 2,906     | 14,418    | 3,206     |
| Log Likelihood         | -2987     | -10717    | -2674     |

```
##
## Random-Effects Model (k = 3; tau^2 estimator: REML)
##
##   logLik deviance      AIC      BIC      AICc
##   8.3322 -16.6644 -12.6644 -15.2781  -0.6644
##
## tau^2 (estimated amount of total heterogeneity): 0.0000 (SE = 0.0000)
## tau (square root of estimated tau^2 value):      0.0027
## I^2 (total heterogeneity / total variability):   53.08%
## H^2 (total variability / sampling variability):  2.13
##
## Test for Heterogeneity:
## Q(df = 2) = 4.6623, p-val = 0.0972
##
## Model Results:
##
## estimate      se      zval      pval      ci.lb      ci.ub
## -0.0012  0.0022 -0.5523  0.5808 -0.0054  0.0030
##
## ---
## Signif. codes:  0 '***' 0.001 '**' 0.01 '*' 0.05 '.' 0.1 ' ' 1
```

### 3.1.5 Interaction with Time Since Dementia

Table S41: Cognitive Change after Dementia Diagnosis, by Agreeableness

| coef                        | EAS       | ROS      | SATSA     |
|-----------------------------|-----------|----------|-----------|
| <b>Fixed Effects</b>        |           |          |           |
| Intercept                   | 0.80      | 1.00     | 0.41      |
| (se)                        | 0.1       | 0.04     | 0.04      |
|                             | p < .001  | p < .001 | p < .001  |
| Age                         | -0.04     | -0.05    | -0.04     |
| (se)                        | 0.01      | 0        | 0         |
|                             | p < .001  | p < .001 | p < .001  |
| Dementia Dx                 | -1.25     | -0.14    | -0.10     |
| (se)                        | 0.11      | 0.01     | 0.03      |
|                             | p < .001  | p < .001 | p = 0.002 |
| Agreeableness               | 0.09      | 0.14     | -0.05     |
| (se)                        | 0.03      | 0.02     | 0.03      |
|                             | p = 0.002 | p < .001 | p = 0.063 |
| Dementia x<br>Agreeableness | -0.05     | -0.03    | 0.07      |
| (se)                        | 0.09      | 0.01     | 0.06      |
|                             | p = 0.299 | p < .001 | p = 0.115 |
| <b>Random Effects</b>       |           |          |           |
| Intercept Variance          | 1.94      | 1.63     | 0.72      |
| Slope Variance              | 0.00      | 0.00     | 0.00      |
| Int-Slope Cov               | -0.08     | -0.07    | -0.01     |
| Residual( $\sigma^2$ )      | 0.26      | 0.16     | 0.15      |
| $N_{people}$                | 736       | 1,466    | 707       |
| $N_{totalobs}$              | 2,906     | 14,441   | 3,232     |
| Log Likelihood              | -3082     | -10792   | -2759     |

```
##
## Random-Effects Model (k = 3; tau^2 estimator: REML)
##
##   logLik deviance      AIC      BIC      AICc
##   2.5781  -5.1562  -1.1562  -3.7699   10.8438
##
## tau^2 (estimated amount of total heterogeneity): 0.0017 (SE = 0.0042)
## tau (square root of estimated tau^2 value):      0.0412
## I^2 (total heterogeneity / total variability):   41.15%
## H^2 (total variability / sampling variability):   1.70
##
## Test for Heterogeneity:
## Q(df = 2) = 3.2263, p-val = 0.1993
##
## Model Results:
##
## estimate      se      zval      pval      ci.lb      ci.ub
## -0.0128  0.0338  -0.3794  0.7044  -0.0791  0.0534
##
## ---
## Signif. codes:  0 '***' 0.001 '**' 0.01 '*' 0.05 '.' 0.1 ' ' 1
```

### 3.1.6 Interaction with Time Since Dementia, with covariates



Table S42: Cognitive Change after Dementia Diagnosis, by Agreeableness (with covariates)

| coef                        | EAS       | ROS      | SATSA     |
|-----------------------------|-----------|----------|-----------|
| <b>Fixed Effects</b>        |           |          |           |
| Intercept                   | 0.44      | 0.35     | 0.32      |
| (se)                        | 0.1       | 0.09     | 0.05      |
|                             | p < .001  | p < .001 | p < .001  |
| Age                         | -0.04     | -0.05    | -0.04     |
| (se)                        | 0         | 0        | 0         |
|                             | p < .001  | p < .001 | p < .001  |
| Dementia Dx                 | -1.26     | -0.13    | -0.10     |
| (se)                        | 0.11      | 0.01     | 0.03      |
|                             | p < .001  | p < .001 | p = 0.002 |
| Agreeableness               | 0.07      | 0.08     | -0.02     |
| (se)                        | 0.03      | 0.02     | 0.03      |
|                             | p = 0.006 | p < .001 | p = 0.279 |
| Sex                         | 0.00      | 0.32     | 0.10      |
| (se)                        | 0.06      | 0.05     | 0.06      |
|                             | p = 0.484 | p < .001 | p = 0.052 |
| Race                        | 0.67      | 0.47     |           |
| (se)                        | 0.06      | 0.08     |           |
|                             | p < .001  | p < .001 |           |
| Education                   | 0.25      | 0.20     | 0.34      |
| (se)                        | 0.03      | 0.02     | 0.03      |
|                             | p < .001  | p < .001 | p < .001  |
| Dementia x<br>Agreeableness | -0.07     | -0.03    | 0.07      |
| (se)                        | 0.09      | 0.01     | 0.06      |
|                             | p = 0.21  | p < .001 | p = 0.13  |
| <b>Random Effects</b>       |           |          |           |
| Intercept Variance          | 1.24      | 1.42     | 0.59      |
| Slope Variance              | 0.00      | 0.00     | 0.00      |
| Int-Slope Cov               | -0.06     | -0.06    | -0.01     |
| Residual( $\sigma^2$ )      | 0.26      | 0.16     | 0.15      |
| $N_{people}$                | 736       | 1,465    | 701       |
| $N_{totalobs}$              | 2,906     | 14,418   | 3,206     |
| Log Likelihood              | -2987     | -10700   | -2677     |

```
##
## Random-Effects Model (k = 3; tau^2 estimator: REML)
##
##   logLik deviance      AIC      BIC      AICc
##  2.5504  -5.1007  -1.1007  -3.7145  10.8993
##
## tau^2 (estimated amount of total heterogeneity): 0.0014 (SE = 0.0038)
## tau (square root of estimated tau^2 value):      0.0367
## I^2 (total heterogeneity / total variability):   35.92%
## H^2 (total variability / sampling variability):  1.56
##
## Test for Heterogeneity:
## Q(df = 2) = 3.1078, p-val = 0.2114
##
## Model Results:
##
## estimate      se      zval      pval      ci.lb      ci.ub
## -0.0180  0.0310  -0.5816  0.5608  -0.0788  0.0427
##
## ---
## Signif. codes:  0 '***' 0.001 '**' 0.01 '*' 0.05 '.' 0.1 ' ' 1
```

### 3.1.7 Interaction with both Age and Time Since Dementia

Table S43: Cognitive Trajectories Across Age and Time Since Dementia Diagnosis, by Agreeableness

| coef                        | EAS       | ROS       | SATSA     |
|-----------------------------|-----------|-----------|-----------|
| <b>Fixed Effects</b>        |           |           |           |
| Intercept                   | 0.80      | 1.00      | 0.41      |
| (se)                        | 0.1       | 0.04      | 0.04      |
|                             | p < .001  | p < .001  | p < .001  |
| Age                         | -0.04     | -0.05     | -0.04     |
| (se)                        | 0.01      | 0         | 0         |
|                             | p < .001  | p < .001  | p < .001  |
| Dementia Dx                 | -1.25     | -0.14     | -0.10     |
| (se)                        | 0.11      | 0.01      | 0.03      |
|                             | p < .001  | p < .001  | p = 0.002 |
| Agreeableness               | 0.08      | 0.09      | 0.00      |
| (se)                        | 0.1       | 0.04      | 0.04      |
|                             | p = 0.219 | p = 0.021 | p = 0.449 |
| Age x Agreeableness         | 0.00      | 0.00      | 0.00      |
| (se)                        | 0.01      | 0         | 0         |
|                             | p = 0.449 | p = 0.07  | p = 0.005 |
| Dementia x<br>Agreeableness | -0.05     | -0.04     | 0.07      |
| (se)                        | 0.09      | 0.01      | 0.06      |
|                             | p = 0.295 | p < .001  | p = 0.102 |
| <b>Random Effects</b>       |           |           |           |
| Intercept Variance          | 1.94      | 1.64      | 0.72      |
| Slope Variance              | 0.00      | 0.00      | 0.00      |
| Int-Slope Cov               | -0.08     | -0.07     | -0.01     |
| Residual( $\sigma^2$ )      | 0.26      | 0.16      | 0.15      |
| <i>N<sub>people</sub></i>   | 736       | 1,466     | 707       |
| <i>N<sub>totalobs</sub></i> | 2,906     | 14,441    | 3,232     |
| Log Likelihood              | -3082     | -10791    | -2756     |

```
##
## Random-Effects Model (k = 3; tau^2 estimator: REML)
##
##   logLik  deviance      AIC      BIC      AICc
##   2.6191  -5.2382  -1.2382  -3.8519  10.7618
##
## tau^2 (estimated amount of total heterogeneity): 0.0018 (SE = 0.0045)
## tau (square root of estimated tau^2 value):      0.0419
## I^2 (total heterogeneity / total variability):   39.29%
## H^2 (total variability / sampling variability):  1.65
##
## Test for Heterogeneity:
## Q(df = 2) = 2.8461, p-val = 0.2410
##
## Model Results:
##
## estimate      se      zval      pval      ci.lb      ci.ub
##   0.0434  0.0386  1.1235  0.2612  -0.0323  0.1190
##
## ---
## Signif. codes:  0 '***' 0.001 '**' 0.01 '*' 0.05 '.' 0.1 ' ' 1
```

#### 4.0 Likelihood ratio tests comparing models with fixed effect and random effects; power analysis

### Linear Trajectories of Cognitive Performance Over Time, adjusted for Agreeableness

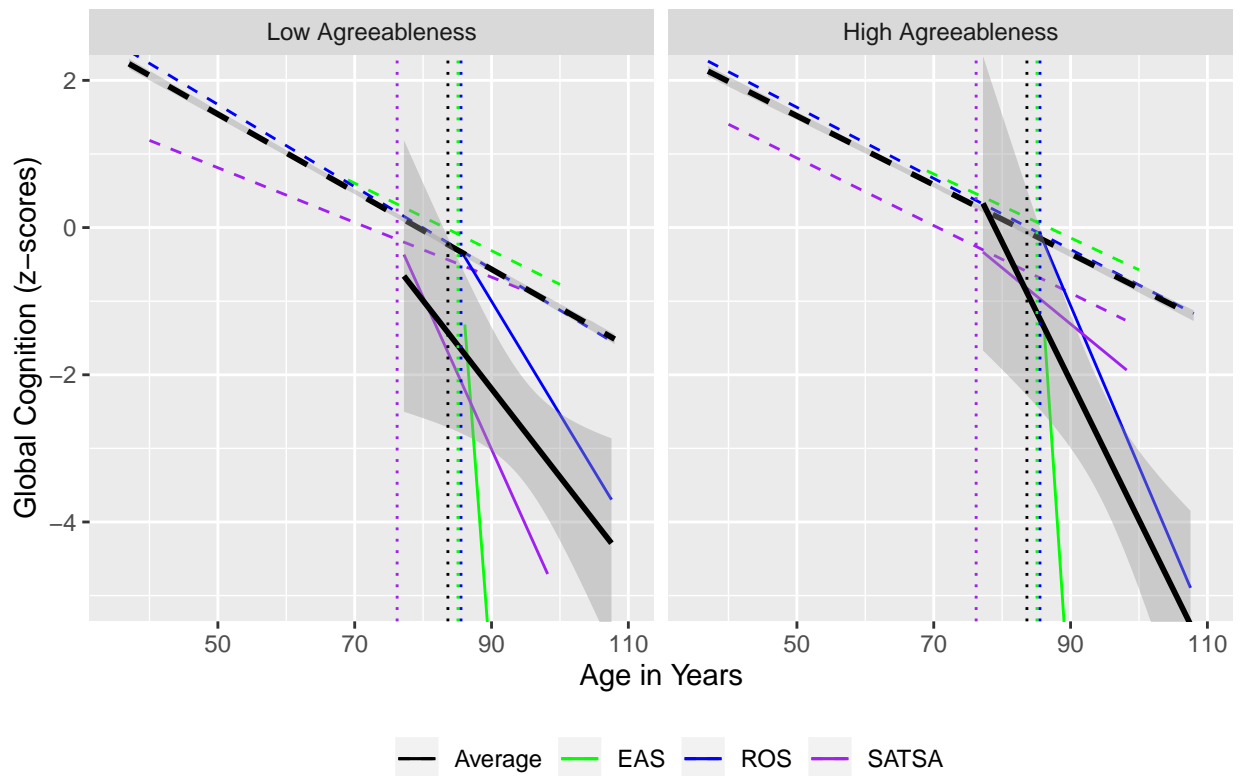

Figure S5: Overall cognitive trajectories across studies and the unique slope for individuals with dementia, among individuals high and low in Agreeableness, and the average trajectories weighted by sample size

```

## $EAS
## $EAS$age
## ANOVA-like table for random-effects: Single term deletions
##
## Model:
## cog ~ age + (1 + age | id)
##           npar  logLik    AIC    LRT Df Pr(>Chisq)
## <none>           6 -3155.5 6323.0
## age in (1 + age | id)    4 -3191.7 6391.4 72.399  2 < 2.2e-16 ***
## ---
## Signif. codes:  0 '***' 0.001 '**' 0.01 '*' 0.05 '.' 0.1 ' ' 1
##
## $EAS$demdx
## ANOVA-like table for random-effects: Single term deletions
##
## Model:
## cog ~ age + demdx + sex + educ + race + (1 + age | id)
##           npar  logLik    AIC    LRT Df Pr(>Chisq)
## <none>          10 -2990.1 6000.2
## age in (1 + age | id)    8 -3022.3 6060.6 64.403  2 1.035e-14 ***
## ---
## Signif. codes:  0 '***' 0.001 '**' 0.01 '*' 0.05 '.' 0.1 ' ' 1
##
## $EAS$neuro
## ANOVA-like table for random-effects: Single term deletions
##
## Model:
## cog ~ age + demdx + neuro + sex + educ + race + (1 + age | id) +
##   age:neuro + demdx:neuro
##           npar  logLik    AIC    LRT Df Pr(>Chisq)
## <none>          13 -2975.9 5977.9
## age in (1 + age | id)   11 -3005.9 6033.9 60.001  2 9.351e-14 ***
## ---
## Signif. codes:  0 '***' 0.001 '**' 0.01 '*' 0.05 '.' 0.1 ' ' 1
##
## $EAS$extra
## ANOVA-like table for random-effects: Single term deletions
##
## Model:
## cog ~ age + demdx + extra + sex + educ + race + (1 + age | id) +
##   age:extra + demdx:extra
##           npar  logLik    AIC    LRT Df Pr(>Chisq)
## <none>          13 -2957.6 5941.1
## age in (1 + age | id)   11 -2987.4 5996.8 59.664  2 1.107e-13 ***
## ---
## Signif. codes:  0 '***' 0.001 '**' 0.01 '*' 0.05 '.' 0.1 ' ' 1
##
## $EAS$open
## ANOVA-like table for random-effects: Single term deletions
##
## Model:
## cog ~ age + demdx + open + sex + educ + race + (1 + age | id) +
##   age:open + demdx:open
##           npar  logLik    AIC    LRT Df Pr(>Chisq)

```

```

## <none>                13 -2978.0 5981.9
## age in (1 + age | id)  11 -3009.4 6040.8 62.924  2  2.169e-14 ***
## ---
## Signif. codes:  0 '***' 0.001 '**' 0.01 '*' 0.05 '.' 0.1 ' ' 1
##
## $EAS$consc
## ANOVA-like table for random-effects: Single term deletions
##
## Model:
## cog ~ age + demdx + consc + sex + educ + race + (1 + age | id) +
##   age:consc + demdx:consc
##               npar logLik   AIC   LRT Df Pr(>Chisq)
## <none>                13 -2988.8 6003.6
## age in (1 + age | id)  11 -3019.9 6061.8 62.263  2  3.018e-14 ***
## ---
## Signif. codes:  0 '***' 0.001 '**' 0.01 '*' 0.05 '.' 0.1 ' ' 1
##
## $EAS$agree
## ANOVA-like table for random-effects: Single term deletions
##
## Model:
## cog ~ age + demdx + agree + sex + educ + race + (1 + age | id) +
##   age:agree + demdx:agree
##               npar logLik   AIC   LRT Df Pr(>Chisq)
## <none>                13 -2986.7 5999.3
## age in (1 + age | id)  11 -3018.8 6059.5 64.183  2  1.156e-14 ***
## ---
## Signif. codes:  0 '***' 0.001 '**' 0.01 '*' 0.05 '.' 0.1 ' ' 1
##
##
## $SATSA
## $SATSA$age
## ANOVA-like table for random-effects: Single term deletions
##
## Model:
## cog ~ age + (1 + age | id)
##               npar logLik   AIC   LRT Df Pr(>Chisq)
## <none>                6 -3262.3 6536.7
## age in (1 + age | id)  4 -3419.8 6847.5 314.88  2  < 2.2e-16 ***
## ---
## Signif. codes:  0 '***' 0.001 '**' 0.01 '*' 0.05 '.' 0.1 ' ' 1
##
## $SATSA$demdx
## ANOVA-like table for random-effects: Single term deletions
##
## Model:
## cog ~ age + demdx + sex + educ + (1 + age | id)
##               npar logLik   AIC   LRT Df Pr(>Chisq)
## <none>                9 -3144.2 6306.4
## age in (1 + age | id)  7 -3293.7 6601.3 298.95  2  < 2.2e-16 ***
## ---
## Signif. codes:  0 '***' 0.001 '**' 0.01 '*' 0.05 '.' 0.1 ' ' 1
##
## $SATSA$neuro

```

```

## ANOVA-like table for random-effects: Single term deletions
##
## Model:
## cog ~ age + demdx + neuro + sex + educ + (1 + age | id) + age:neuro +
##   demdx:neuro
##           npar  logLik    AIC    LRT Df Pr(>Chisq)
## <none>           12 -3102.1 6228.2
## age in (1 + age | id)  10 -3251.0 6522.1 297.87  2 < 2.2e-16 ***
## ---
## Signif. codes:  0 '***' 0.001 '**' 0.01 '*' 0.05 '.' 0.1 ' ' 1
##
## $SATSA$extra
## ANOVA-like table for random-effects: Single term deletions
##
## Model:
## cog ~ age + demdx + extra + sex + educ + (1 + age | id) + age:extra +
##   demdx:extra
##           npar  logLik    AIC    LRT Df Pr(>Chisq)
## <none>           12 -3105.2 6234.5
## age in (1 + age | id)  10 -3253.1 6526.3 295.79  2 < 2.2e-16 ***
## ---
## Signif. codes:  0 '***' 0.001 '**' 0.01 '*' 0.05 '.' 0.1 ' ' 1
##
## $SATSA$open
## ANOVA-like table for random-effects: Single term deletions
##
## Model:
## cog ~ age + demdx + open + sex + educ + (1 + age | id) + age:open +
##   demdx:open
##           npar  logLik    AIC    LRT Df Pr(>Chisq)
## <none>           12 -2556.9 5137.8
## age in (1 + age | id)  10 -2667.3 5354.5 220.73  2 < 2.2e-16 ***
## ---
## Signif. codes:  0 '***' 0.001 '**' 0.01 '*' 0.05 '.' 0.1 ' ' 1
##
## $SATSA$consc
## ANOVA-like table for random-effects: Single term deletions
##
## Model:
## cog ~ age + demdx + consc + sex + educ + (1 + age | id) + age:consc +
##   demdx:consc
##           npar  logLik    AIC    LRT Df Pr(>Chisq)
## <none>           12 -2668.8 5361.6
## age in (1 + age | id)  10 -2785.2 5590.4 232.82  2 < 2.2e-16 ***
## ---
## Signif. codes:  0 '***' 0.001 '**' 0.01 '*' 0.05 '.' 0.1 ' ' 1
##
## $SATSA$agree
## ANOVA-like table for random-effects: Single term deletions
##
## Model:
## cog ~ age + demdx + agree + sex + educ + (1 + age | id) + age:agree +
##   demdx:agree
##           npar  logLik    AIC    LRT Df Pr(>Chisq)

```

```

## <none>                12 -2673.7 5371.4
## age in (1 + age | id)  10 -2792.4 5604.9 237.51  2 < 2.2e-16 ***
## ---
## Signif. codes:  0 '***' 0.001 '**' 0.01 '*' 0.05 '.' 0.1 ' ' 1
##
##
## $ROS
## $ROS$age
## ANOVA-like table for random-effects: Single term deletions
##
## Model:
## cog ~ age + (1 + age | id)
##          npar logLik  AIC    LRT Df Pr(>Chisq)
## <none>          6 -11110 22232
## age in (1 + age | id)  4 -12779 25566 3338.4  2 < 2.2e-16 ***
## ---
## Signif. codes:  0 '***' 0.001 '**' 0.01 '*' 0.05 '.' 0.1 ' ' 1
##
## $ROS$demdx
## ANOVA-like table for random-effects: Single term deletions
##
## Model:
## cog ~ age + demdx + sex + educ + race + (1 + age | id)
##          npar logLik  AIC    LRT Df Pr(>Chisq)
## <none>          10 -10820 21659
## age in (1 + age | id)  8 -12170 24357 2701.5  2 < 2.2e-16 ***
## ---
## Signif. codes:  0 '***' 0.001 '**' 0.01 '*' 0.05 '.' 0.1 ' ' 1
##
## $ROS$neuro
## ANOVA-like table for random-effects: Single term deletions
##
## Model:
## cog ~ age + demdx + neuro + sex + educ + race + (1 + age | id) +
##   age:neuro + demdx:neuro
##          npar logLik  AIC    LRT Df Pr(>Chisq)
## <none>          13 -10744 21513
## age in (1 + age | id)  11 -12098 24217 2707.9  2 < 2.2e-16 ***
## ---
## Signif. codes:  0 '***' 0.001 '**' 0.01 '*' 0.05 '.' 0.1 ' ' 1
##
## $ROS$extra
## ANOVA-like table for random-effects: Single term deletions
##
## Model:
## cog ~ age + demdx + extra + sex + educ + race + (1 + age | id) +
##   age:extra + demdx:extra
##          npar logLik  AIC    LRT Df Pr(>Chisq)
## <none>          13 -10757 21540
## age in (1 + age | id)  11 -12113 24248 2712.3  2 < 2.2e-16 ***
## ---
## Signif. codes:  0 '***' 0.001 '**' 0.01 '*' 0.05 '.' 0.1 ' ' 1
##
## $ROS$open

```



```

## ANOVA-like table for random-effects: Single term deletions
##
## Model:
## cog ~ age + demdx + open + sex + educ + race + (1 + age | id) +
##   age:open + demdx:open
##           npar logLik  AIC    LRT Df Pr(>Chisq)
## <none>           13 -10718 21461
## age in (1 + age | id)  11 -12045 24111 2653.9  2 < 2.2e-16 ***
## ---
## Signif. codes:  0 '***' 0.001 '**' 0.01 '*' 0.05 '.' 0.1 ' ' 1
##
## $ROS$consc
## ANOVA-like table for random-effects: Single term deletions
##
## Model:
## cog ~ age + demdx + consc + sex + educ + race + (1 + age | id) +
##   age:consc + demdx:consc
##           npar logLik  AIC    LRT Df Pr(>Chisq)
## <none>           13 -10747 21520
## age in (1 + age | id)  11 -12107 24236 2720.1  2 < 2.2e-16 ***
## ---
## Signif. codes:  0 '***' 0.001 '**' 0.01 '*' 0.05 '.' 0.1 ' ' 1
##
## $ROS$agree
## ANOVA-like table for random-effects: Single term deletions
##
## Model:
## cog ~ age + demdx + agree + sex + educ + race + (1 + age | id) +
##   age:agree + demdx:agree
##           npar logLik  AIC    LRT Df Pr(>Chisq)
## <none>           13 -10699 21424
## age in (1 + age | id)  11 -12034 24091 2671.1  2 < 2.2e-16 ***
## ---
## Signif. codes:  0 '***' 0.001 '**' 0.01 '*' 0.05 '.' 0.1 ' ' 1
##
##
## $MAP
## $MAP$age
## ANOVA-like table for random-effects: Single term deletions
##
## Model:
## cog ~ age + (1 + age | id)
##           npar logLik  AIC    LRT Df Pr(>Chisq)
## <none>           6 -11185 22382
## age in (1 + age | id)  4 -12332 24673 2295.2  2 < 2.2e-16 ***
## ---
## Signif. codes:  0 '***' 0.001 '**' 0.01 '*' 0.05 '.' 0.1 ' ' 1
##
## $MAP$demdx
## ANOVA-like table for random-effects: Single term deletions
##
## Model:
## cog ~ age + demdx + sex + educ + race + (1 + age | id)
##           npar logLik  AIC    LRT Df Pr(>Chisq)

```

```

## <none>                10 -10918 21856
## age in (1 + age | id)  8 -11917 23850 1998.3 2 < 2.2e-16 ***
## ---
## Signif. codes:  0 '***' 0.001 '**' 0.01 '*' 0.05 '.' 0.1 ' ' 1
##
## $MAP$neuro
## ANOVA-like table for random-effects: Single term deletions
##
## Model:
## cog ~ age + demdx + neuro + sex + educ + race + (1 + age | id) +
##   age:neuro + demdx:neuro
##               npar logLik  AIC   LRT Df Pr(>Chisq)
## <none>                13 -9031.1 18088
## age in (1 + age | id)  11 -9964.8 19952 1867.3 2 < 2.2e-16 ***
## ---
## Signif. codes:  0 '***' 0.001 '**' 0.01 '*' 0.05 '.' 0.1 ' ' 1
##
## $MAP$extra
## ANOVA-like table for random-effects: Single term deletions
##
## Model:
## cog ~ age + demdx + extra + sex + educ + race + (1 + age | id) +
##   age:extra + demdx:extra
##               npar logLik  AIC   LRT Df Pr(>Chisq)
## <none>                13 -10239 20504
## age in (1 + age | id)  11 -11198 22418 1918 2 < 2.2e-16 ***
## ---
## Signif. codes:  0 '***' 0.001 '**' 0.01 '*' 0.05 '.' 0.1 ' ' 1
##
## $MAP$consc
## ANOVA-like table for random-effects: Single term deletions
##
## Model:
## cog ~ age + demdx + consc + sex + educ + race + (1 + age | id) +
##   age:consc + demdx:consc
##               npar logLik  AIC   LRT Df Pr(>Chisq)
## <none>                13 -6597 13220
## age in (1 + age | id)  11 -7403 14828 1611.9 2 < 2.2e-16 ***
## ---
## Signif. codes:  0 '***' 0.001 '**' 0.01 '*' 0.05 '.' 0.1 ' ' 1
##
## $EAS
##           n power.given power.small power.med power.large
## 1 2906           4.9           68.4           100           100
##
## $ROS
##           n power.given power.small power.med power.large
## 1 14474           76.9           99.9           100           100
##
## $MAP
##           n power.given power.small power.med power.large
## 1 12712           42.4           99.9           100           100

```
